# Supplementary material for: A novel fragmented mitochondrial genome in the protist pathogen Toxoplasma gondii and related tissue coccidia
Source: HighWire-hosted journal article supplement (doi:10.1101/gr.266403.120), 2021-04-27
Supplement: Supplemental_Figures_.pdf [file Supplemental_Figures_.pdf]

## Supplemental Figures

### **A novel fragmented mitochondrial genome in the protist pathogen *Toxoplasma gondii* and related tissue coccidia**

Sivaranjani Namasivayam<sup>1,2</sup>, Rodrigo P. Baptista<sup>2,3</sup>, Wenyuan Xiao<sup>1,2</sup>, Erica M. Hall<sup>1</sup>, Joseph S. Doggett<sup>4,5</sup>, Karin Troell<sup>6</sup> and Jessica C. Kissinger<sup>1,2,3</sup>

<sup>1</sup> Department of Genetics, University of Georgia, Athens, GA, 30602, USA

<sup>2</sup> Center for Tropical and Emerging Global Diseases, University of Georgia, 30602, USA

<sup>3</sup> Institute of Bioinformatics, University of Georgia, Athens, GA 30602, USA

<sup>4</sup> Division of Infectious Diseases, Oregon Health Sciences University, OR, 97239, USA

<sup>5</sup> Division of Infectious Diseases, Veterans Affairs Portland Health Care System, Portland, Oregon 97239, USA

<sup>6</sup> Department of Microbiology, National Veterinary Institute, SE-751 89 Uppsala, Sweden

**Corresponding Author:** Jessica C Kissinger, University of Georgia, 500 D.W. Brooks Drive, Coverdell Center, Athens, GA, 30602, USA

[jkissing@uga.edu](mailto:jkissing@uga.edu), +1-706-542-6562

ORCID: 0000-0002-6413-1101

## TABLE OF CONTENTS

|                                                                                                                              |    |
|------------------------------------------------------------------------------------------------------------------------------|----|
| Fig. S1 – Annotated <i>Toxoplasma gondii</i> RH sequenced mtDNA PCR products.                                                | 3  |
| Fig. S2 - Annotation of select A) <i>T. gondii</i> and B) <i>N. caninum</i> genomic Sanger reads                             | 4  |
| Fig. S3 - Annotation of select A) <i>T. gondii</i> and B) <i>N. caninum</i> Sanger EST reads                                 | 5  |
| Fig. S4 – Annotated <i>Toxoplasma gondii</i> ME49 mtDNA Nanopore reads arranged by length.                                   | 6  |
| Fig. S5 – Comparative representation of identified mtrRNA segments in the Apicomplexa.                                       | 10 |
| Fig. S6 - Annotated <i>Toxoplasma gondii</i> ME49 ONT mtDNA reads with Illumina mapping.                                     | 11 |
| Fig. S7 - Multiple sequence alignments of mitochondrial cytochrome proteins.                                                 | 12 |
| Fig. S8 - Secondary structure of <i>T. gondii</i> sequence block J                                                           | 16 |
| Fig. S9 - Multiple sequence alignment of a subset of uncorrected Nanopore reads from the ENU mutant strain ELQ-316.          | 17 |
| Fig. S10 – Annotated <i>Neospora caninum</i> mtDNA Nanopore reads (2-15 kb) arranged by length                               | 18 |
| Fig. S11 - Dot plot comparisons of <i>T. gondii</i> ME49 and <i>N. caninum</i> Nc-1 sequence blocks to detect microhomology. | 19 |
| Fig. S12 - Upstream and downstream sequence blocks in <i>T. gondii</i> ME49 and <i>N. caninum</i> Nanopore reads.            | 20 |
| Fig. S13 - <i>T. gondii</i> mtDNA is variable in size and does not exist as a tandem repeat unit.                            | 21 |
| Fig. S14 - <i>N. caninum</i> nanopore sequence comparison and degeneration.                                                  | 22 |
| Fig. S15 - Nanopore and Illumina support for possible circular structures.                                                   | 23 |
| Fig. S16 - Nanopore reads predicted to circularize.                                                                          | 24 |

**Fig. S1 – Annotated *Toxoplasma gondii* RH sequenced mtDNA PCR products.**  
Fasta format sequences for these products can be found in Dataset\_S1.

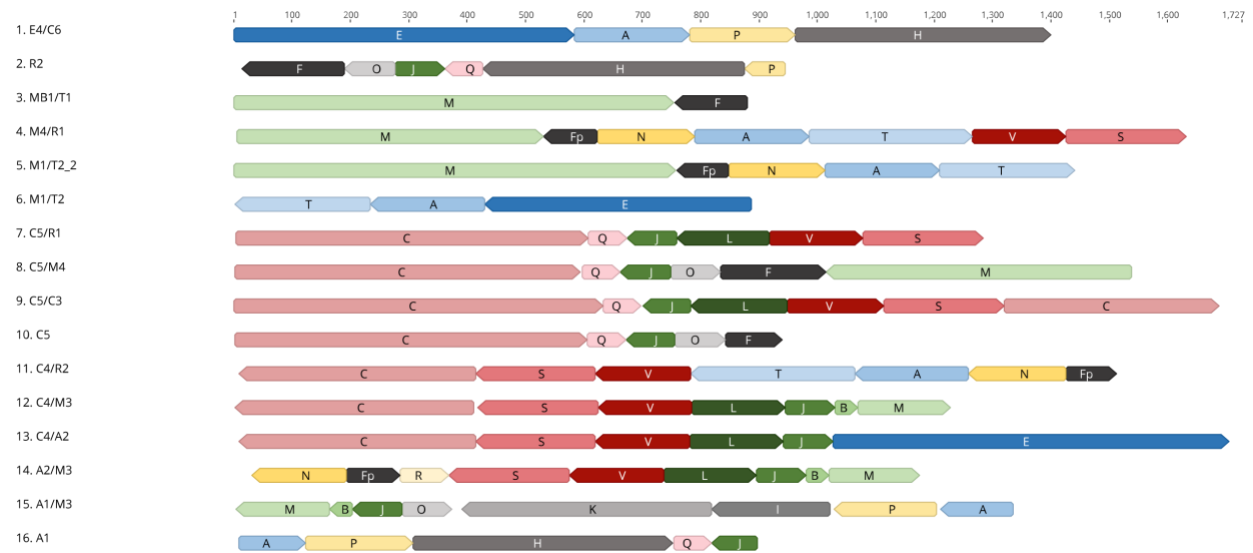

**Fig. S2 - Annotation of select A) *T. gondii* and B) *N. caninum* genomic Sanger reads from NCBI SRA database using the 21 sequence blocks from the respective organism**

**A) *Toxoplasma gondii***

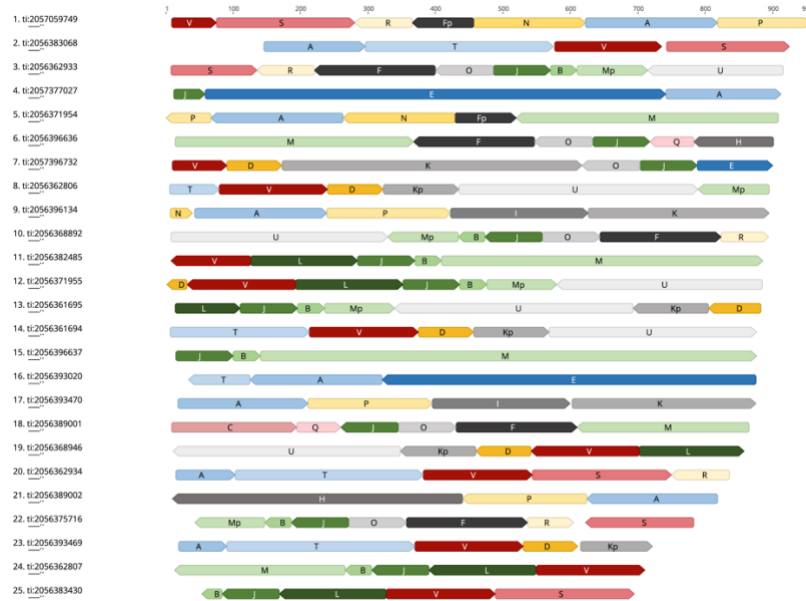

**B) *Neospora caninum***

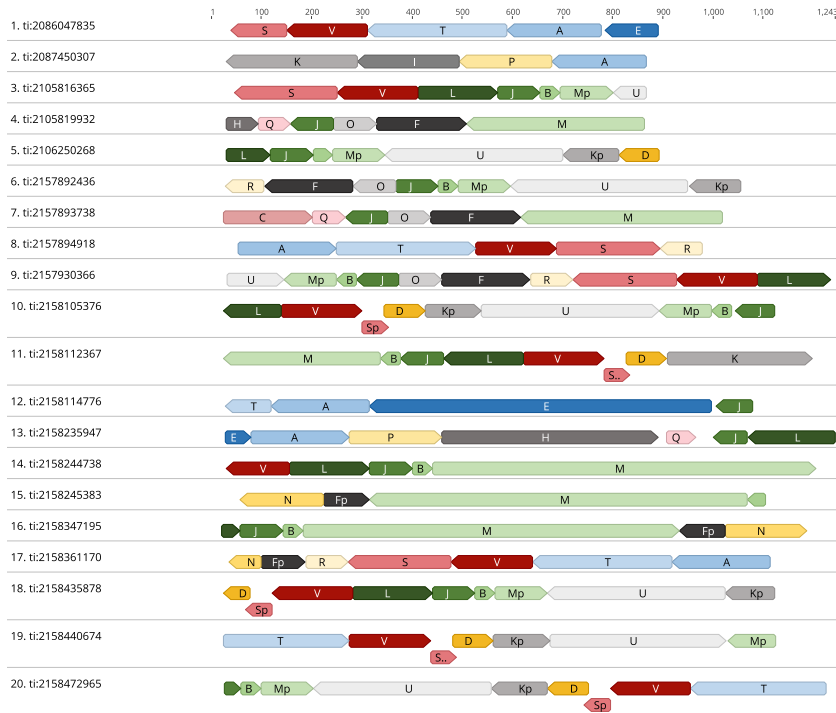

\*When block R and F/Fp occur next to each other in *Neospora caninum*, the last 4 bp of F/Fp are missing and instead this junction contains the 2 nt AC/GT depending on orientation

**Fig. S3 - Annotation of select A) *T. gondii* and B) *N. caninum* Sanger EST reads**  
from the NCBI EST database using the 21 sequence blocks from the respective organism.

**A) Annotated *Toxoplasma gondii* EST reads**

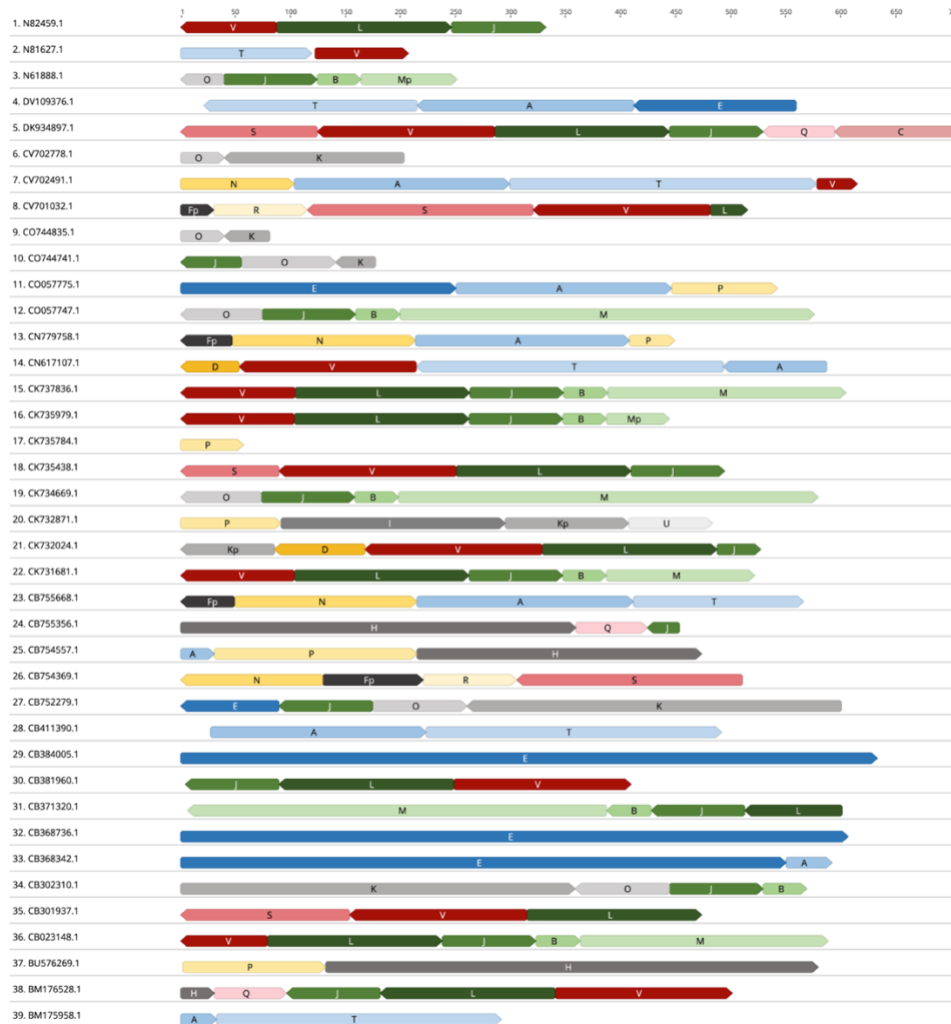

**B) Annotated *Neospora caninum* Sanger EST reads**

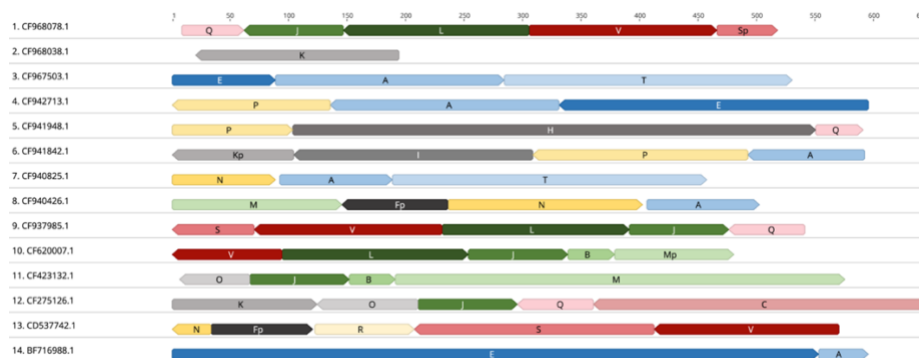

**Fig. S4 – Annotated *Toxoplasma gondii* ME49 mtDNA Nanopore reads arranged by length.**

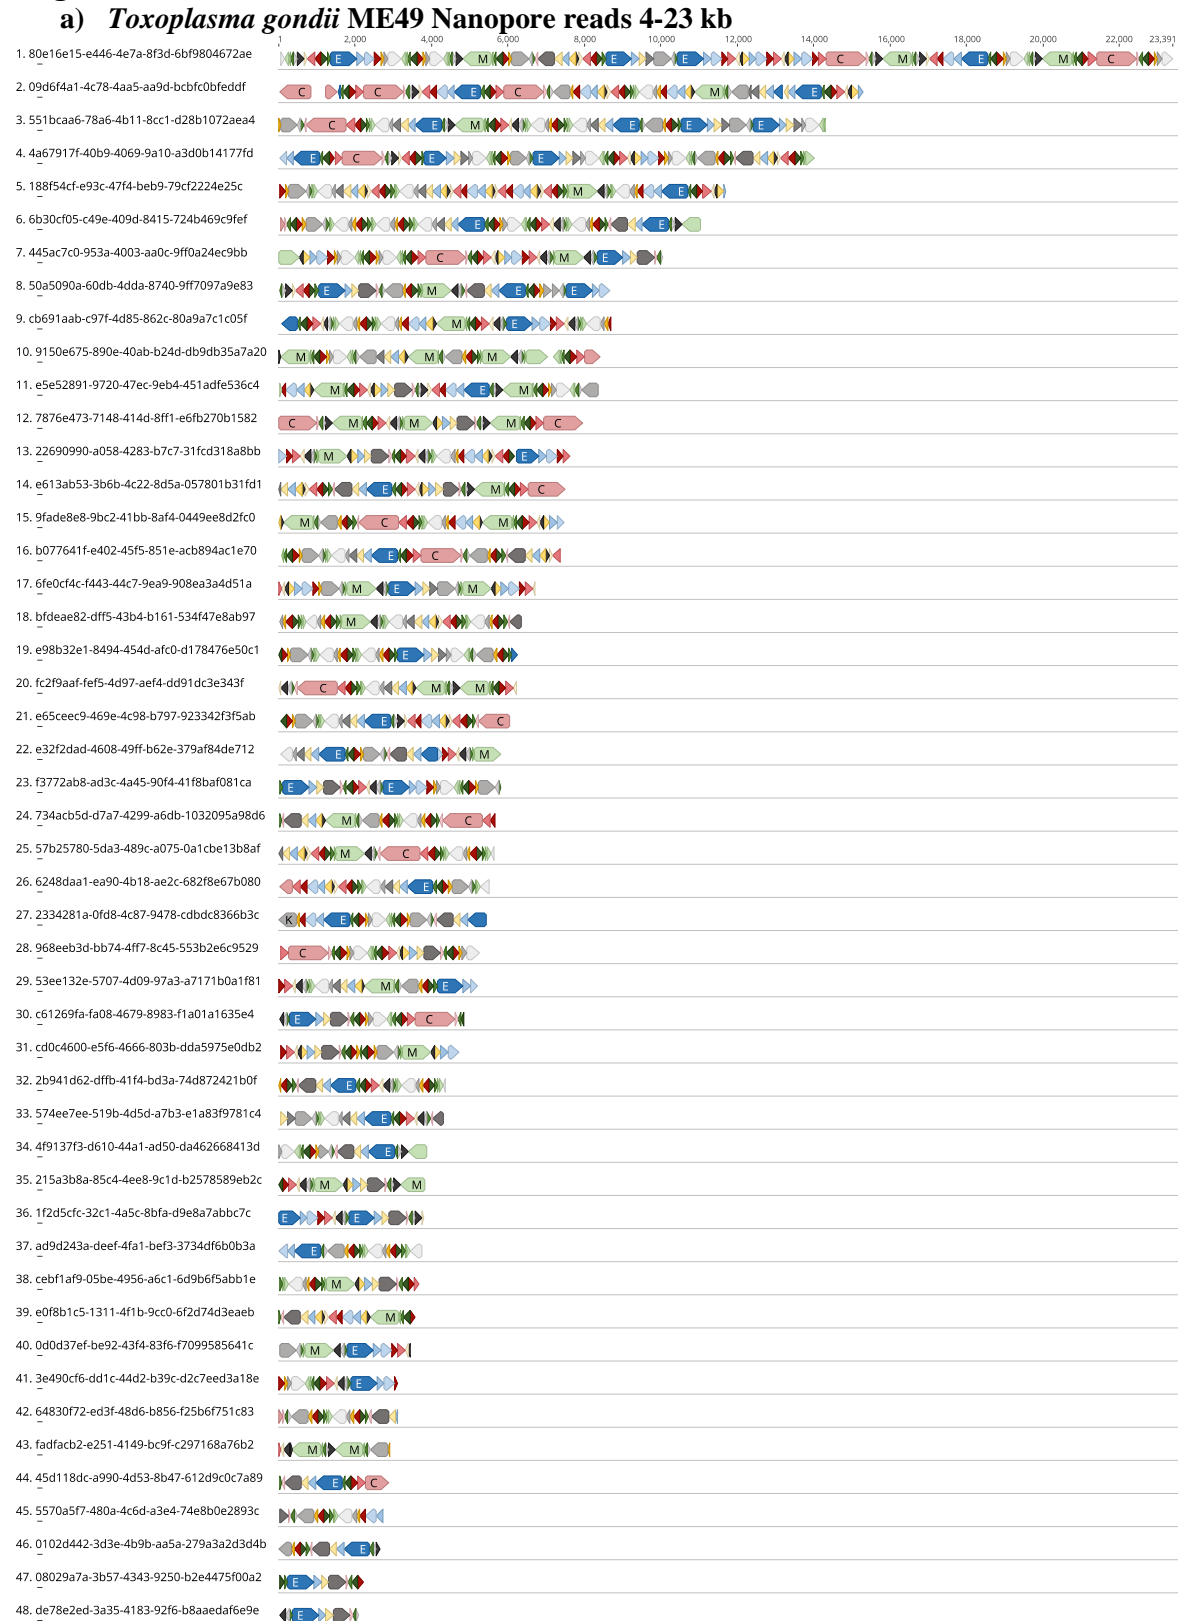

**b) *Toxoplasma gondii* ME49 Nanopore reads 1-4 kb**

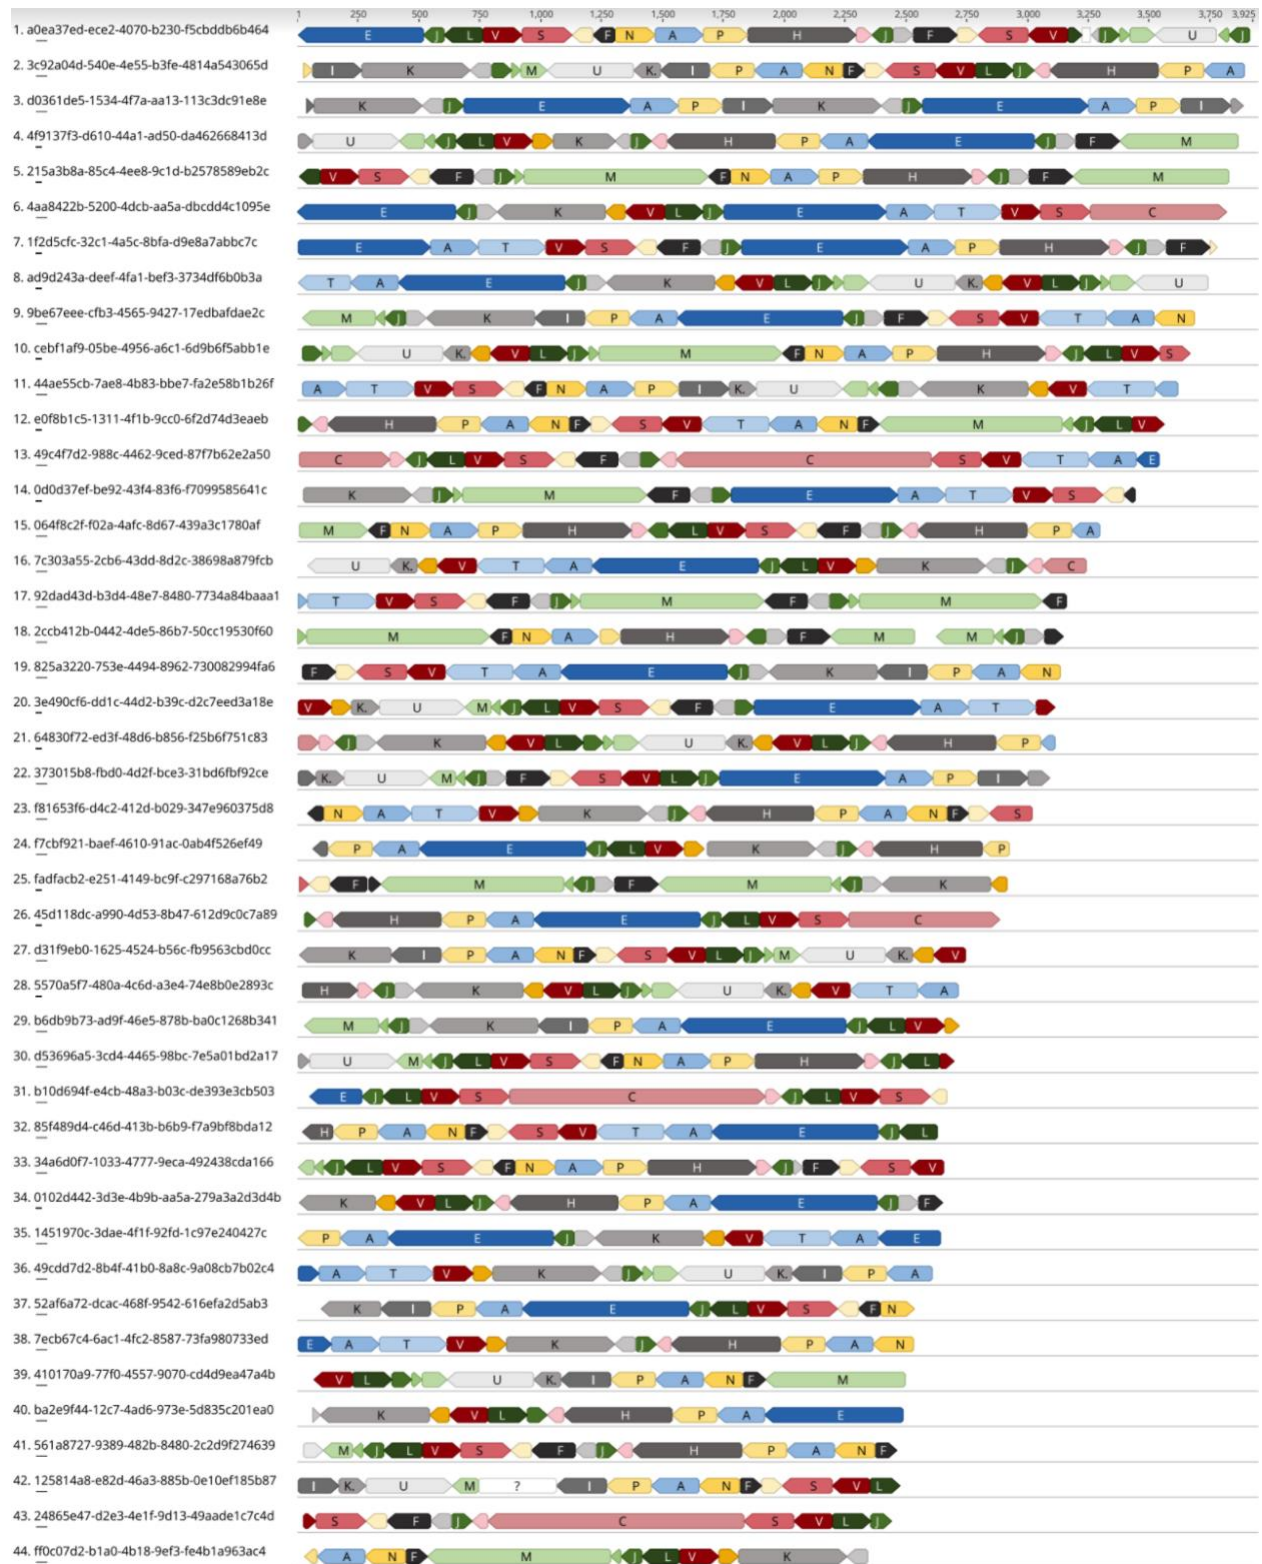

## *Toxoplasma gondii* ME49 Nanopore reads 1-4 kb (continued)

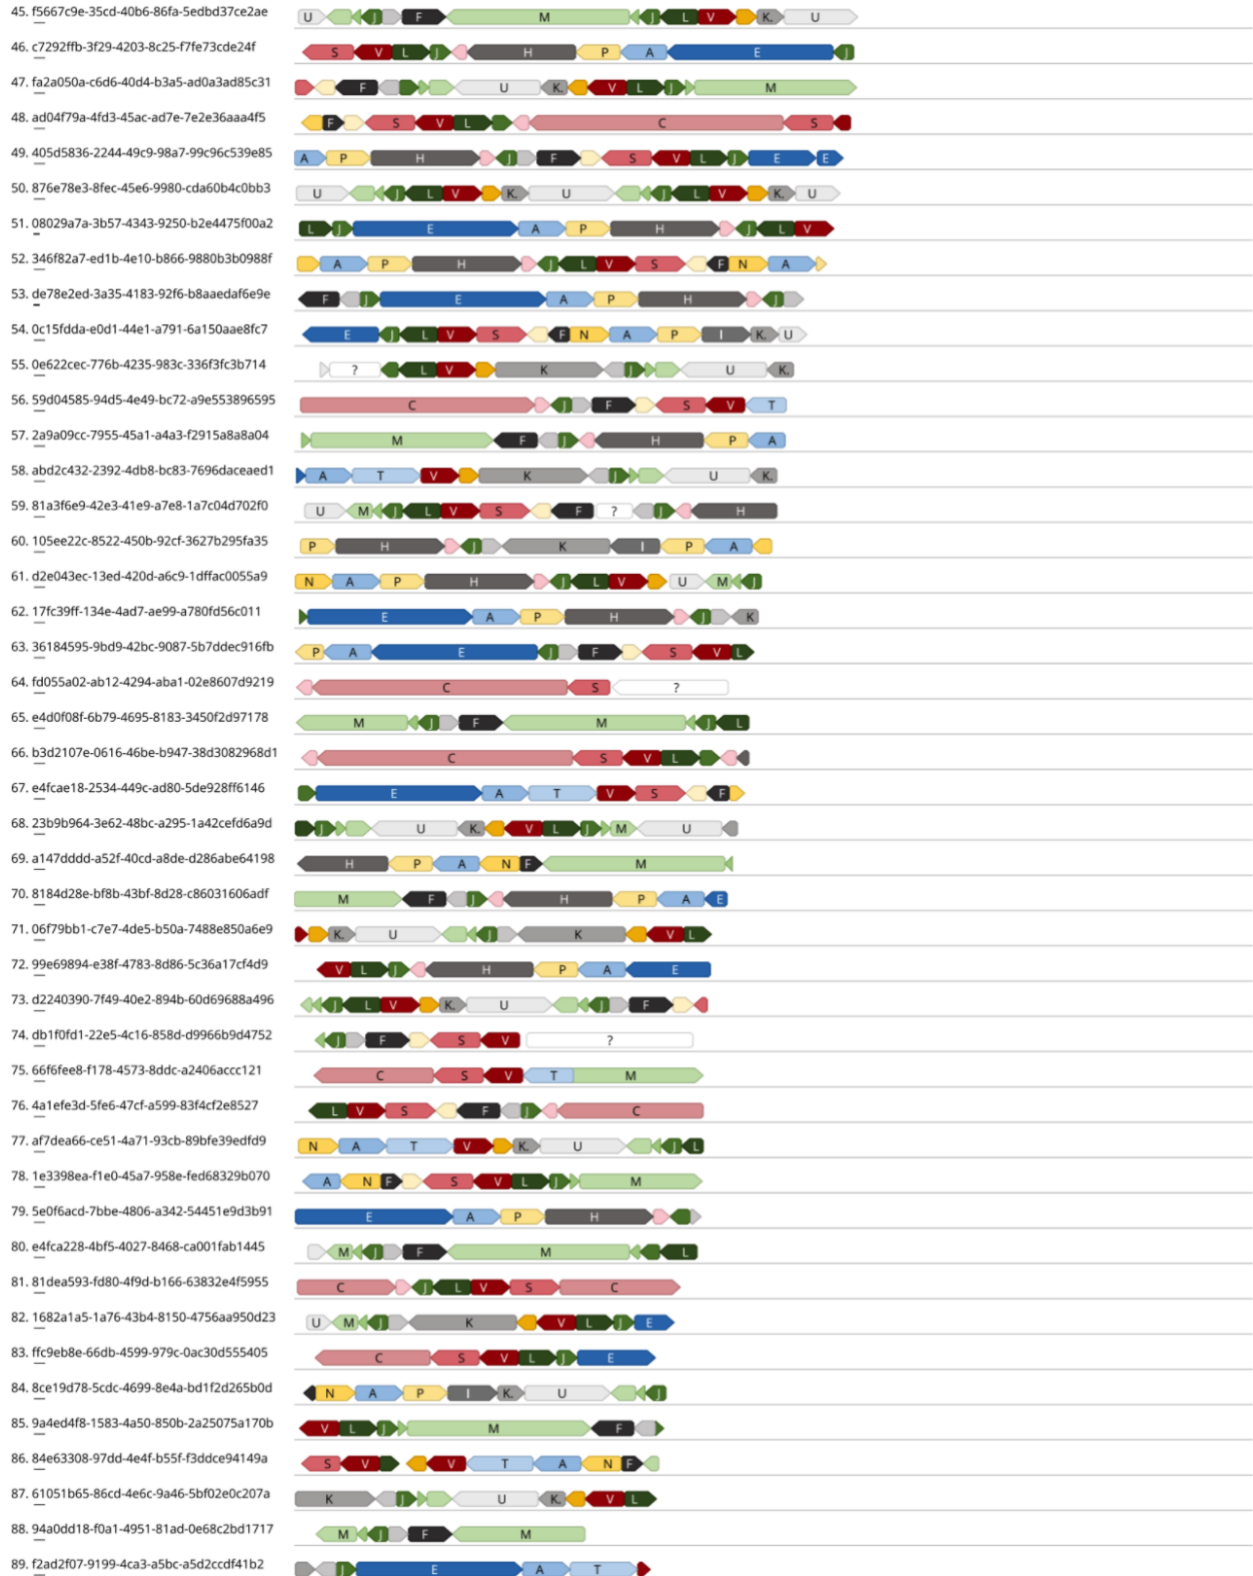

## *Toxoplasma gondii* ME49 Nanopore reads 1-4 kb (continued)

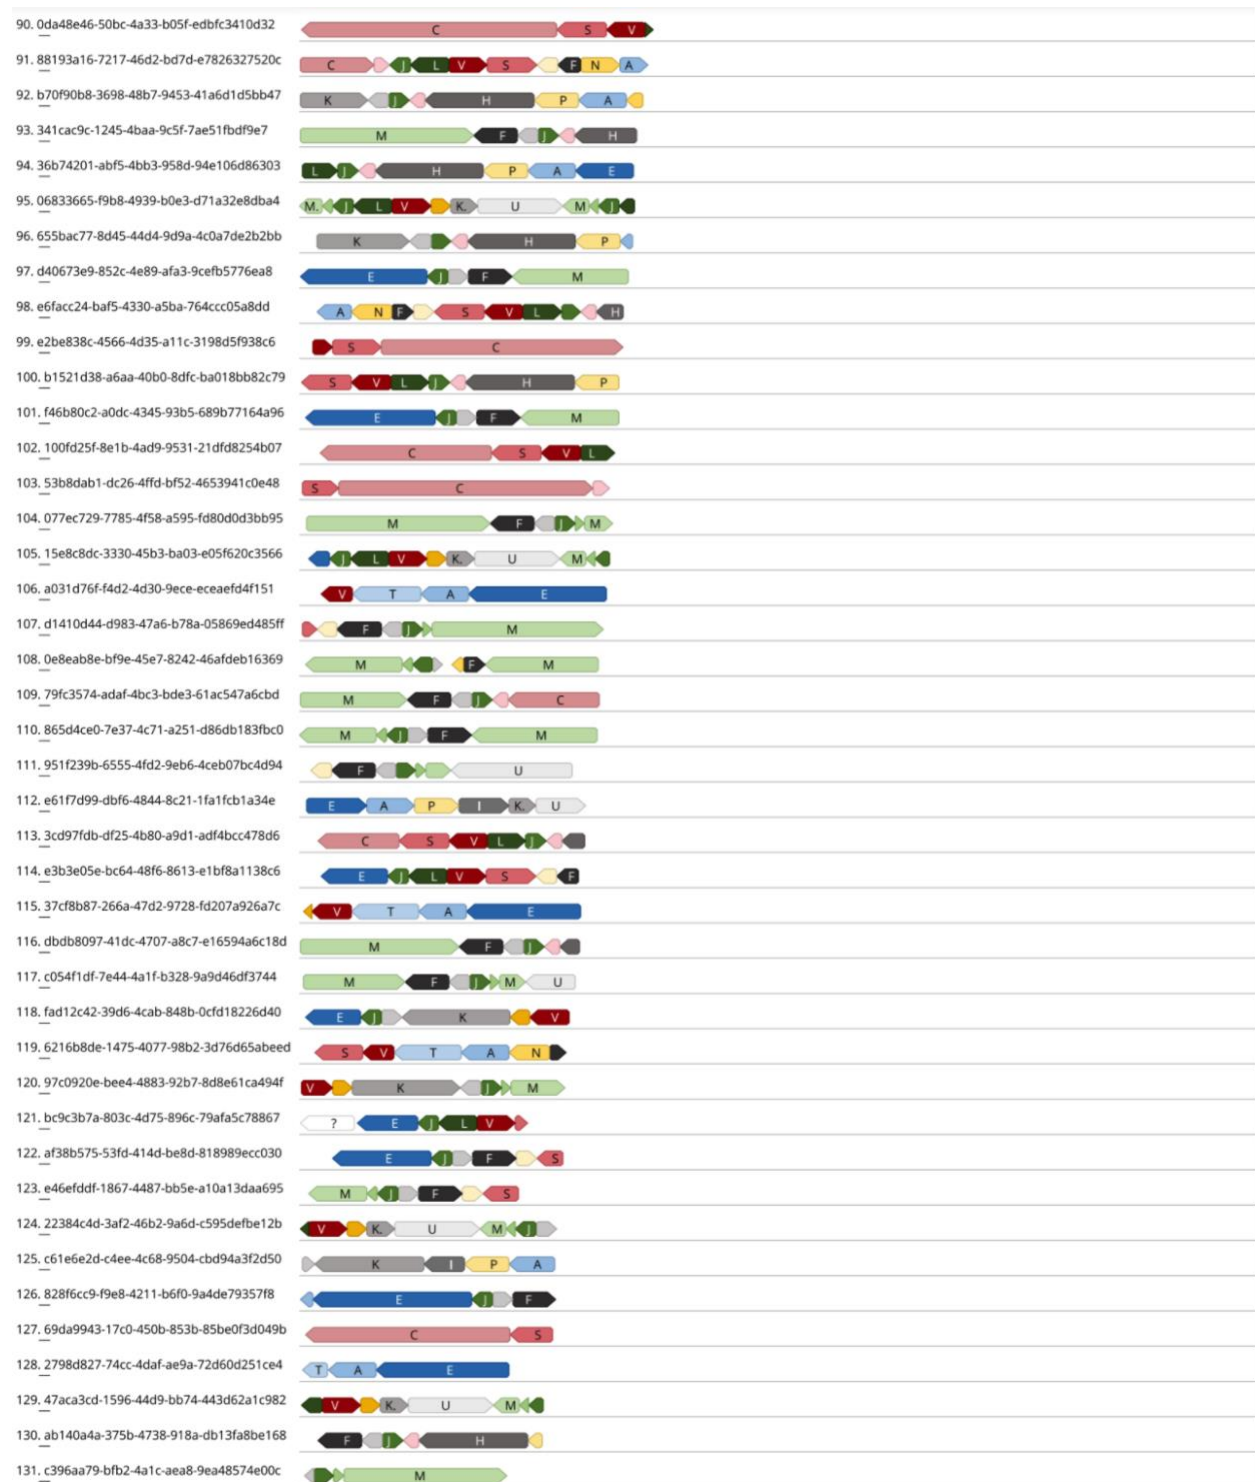

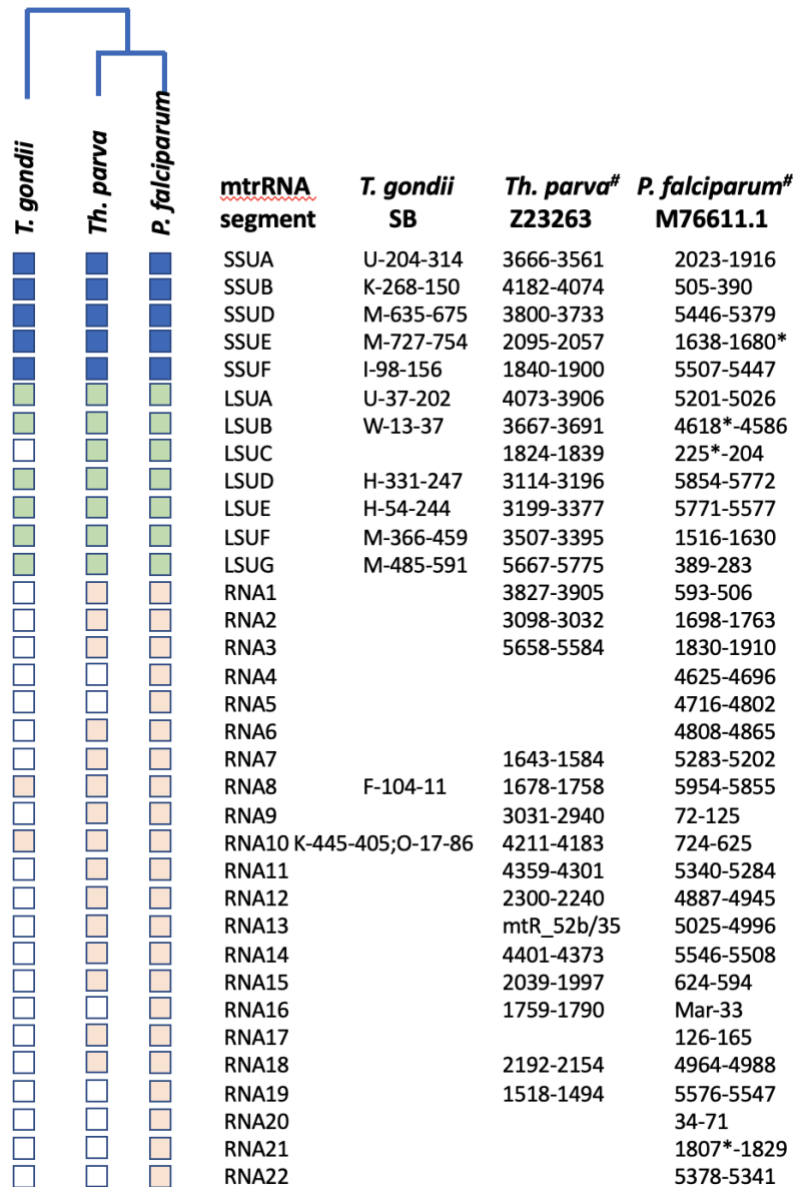

**Fig. S5 – Comparative representation of identified mtrRNA segments in the Apicomplexa.**

# - data from (Feagin et al., 2012). \*-inferred coordinates as in Feagin et al., 2012. The *T. gondii* boundaries are inferred. The lack of computationally identified mtrRNAs in *T. gondii* does not mean they are absent. GenBank accession numbers for the mtDNA genome coordinates are as indicated for *Theileria parva* and *Plasmodium falciparum*. SB = sequence block. Blue squares mtSSU segment identified; Green mtLSU segment identified; Orange rRNA segment identified; Blank square, segment not identified (but may be present).

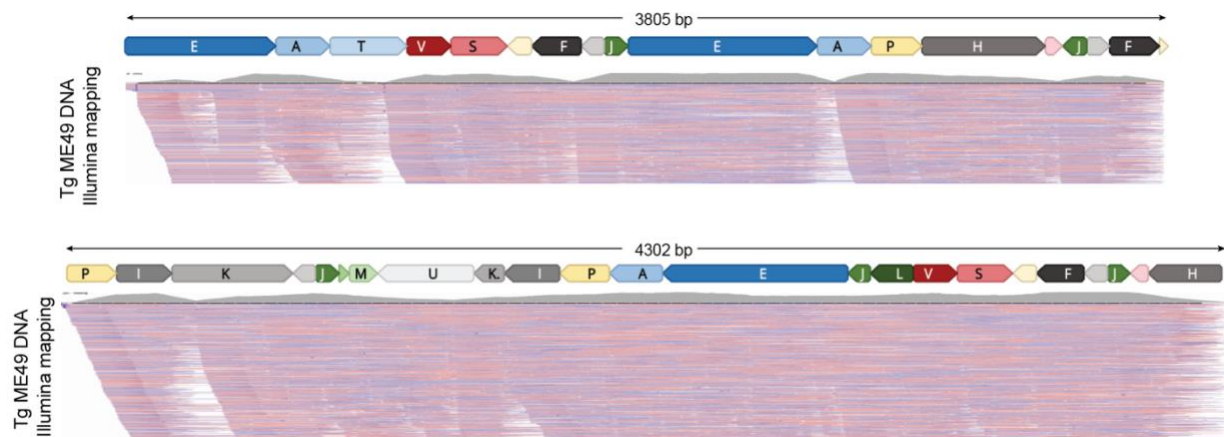

**Fig. S6 - Annotated *Toxoplasma gondii* ME49 ONT mtDNA reads with Illumina mapping.** Each panel represents the annotation of a single Nanopore read with SBs. There are no intervening nucleotides between SBs. The length of the read is indicated above the annotation. MtDNA-specific paired-end Illumina reads generated from *T. gondii* ME49 DNA (SRR9200762) were mapped to the Nanopore sequences and the alignment was visualized using the Integrated Genomics Viewer (IGV). Both Illumina read ends were required to map at 100% identity. A histogram of read abundance is shown in grey just below each annotated Nanopore read. Red and blue lines below each histogram indicate the mapped paired-end reads. Not all mapped reads are shown.

**Fig. S7 - Multiple sequence alignments of mitochondrial cytochrome proteins.** Multiple sequence alignment of COXI, COXIII and COB proteins (A-C) and genes (D-F) from the apicomplexan parasites *P. falciparum*, *E. tenella*, *T. gondii* and *N. caninum*. *T. gondii* and *N. caninum* cytochrome sequences were identified as described in the methods and results. Codon 'ATA' was annotated as the start Methionine for the COXI protein in *T. gondii* and *N. caninum*. Amino acid and corresponding CDS nucleotide sequences were downloaded from NCBI for *P. falciparum* (AAC63390.2, AAC63389.2, AAC63391.1) and *E. tenella* (BAJ25753.1, BAJ25754.1, BAJ25752.1).

### A) Cytochrome B

[illegible]

## B) Cytochrome oxidase I

```

1 Pf_coxI 1 F I I L N S Y S - - - - - 11 T N C N H K T C G L Y Y W F S F I G S Y G F I L S V M I R T I L Y S S L S M I A
2 Et_coxI 1 I S S Y K K P Q Q F Y M N S S I L T A A N H K E I G I Y Y W F A F I S I V G T I L S V L I S L E S S S G L R V V A
3 Nc_coxI 1 M L K S N T S C L K Q S S G V V Y S N H H E I G C L Y M T G V M S I L G T M M S T F I R F I L Y S S G S R I I C
4 Tg_coxI 1 M L K S N T S C L K Q S S G V V Y S N H H E I G C L Y M T G V M S I L G T M M S T F I R F I L Y S S G S R I I C

1 Pf_coxI 130 Q E N V N I Y N V M F I I H G I M I F F N M M P C I F G G Y G N Y F P I L C G S P I A Y P S I N S M S L L I O P I
2 Et_coxI 130 L E N Q N I Y N I A F I I H G A I M I F F V V M P C I F G G Y G N Y F P I Y L G A S V A F P S V N C V S L L I V P I
3 Nc_coxI 130 T E T M S T Y N V M I I M H G L A M I E M F I M P A L Y G G Y G N F F V P I Y I G S E V V F P S T N A I S Y F I V P I
4 Tg_coxI 130 T E T M S T Y N V M I I M H G L A M I E M F I M P A L Y G G Y G N F F V P I Y I G S E V V F P S T N A I S Y F I V P I

1 Pf_coxI 190 A F V I V M L S T A A F F G G C T G W I L Y P P I S T S L M S I S P V A V D V M I F G I L V S G V A S I M S S L N F I T
2 Et_coxI 190 S W V I V S T S L I S E F G S G L G W I L Y P P I S T S L M S I S P T S V D L I V F G I A I S G I S S I S T N F I T
3 Nc_coxI 190 G S V I V T Q S I C S E F F G S G L G W I M Y P P I S T S L M V I N P E A T D M I G G I A M L G I S S I S T N F I G
4 Tg_coxI 190 G S V I V T Q S I C S E F F G S G L G W I M Y P P I S T S L M V I N P E A T D M I G G I A M L G I S S I S T N F I G

1 Pf_coxI 250 I V M H S A K G L L L G M - - L S V S T W S L I I S G R I L L I P V L I G E V M I S D H F N I L F P D P T I
2 Et_coxI 250 I I A V I - - G V T N G S K P W C I E T W A I V F I A I M L G I I P I L G G L V M I V L D I H N I Q E Y D A A I
3 Nc_coxI 250 I C V F M - - G S C A G A K N Y I I Y I W S I F T A L M I V F I P I L I G G L V M I L D I H V N I E Y D S M Y
4 Tg_coxI 250 I C V F M - - G S C A G A K N Y I I Y I W S I F T A L M I V F I P I L I G G L V M I L D I H V N I E Y D S M Y

1 Pf_coxI 310 A G D P M I Y O H I F W F F G H P E V Y I L M I P A F G V I S H V I S T N Y C S N I F G N Q S M M I A M G C M A V I G S
2 Et_coxI 310 N G D P V I Y O H I F W F F G H P E V Y I L I P A F G V Y S Q T I S T S A G K L V F G G P S M I A M G C I T I V I G S
3 Nc_coxI 310 S G D S I Y O H I F W F F G H P E V Y I L I P G F G V I S Q T I S M Y S C S A V F G G Q S M I A M G C I S I I G S
4 Tg_coxI 310 S G D S I Y O H I F W F F G H P E V Y I L I P A F G V Y S Q T I S M Y S C R A V F G G Q S M I A M G C I S I I G S

1 Pf_coxI 370 I V V V I I M Y I I T I E V D I S A V I F S T I I M S M I G T K V A N W M I I A M S N F G M H S S S L S I I
2 Et_coxI 370 I V W A I I M M I V G I E T D S I A V E A I I A M M I A I P G T K I F N W I G I Y M A G N P F S T M S L D I W Y A I S E
3 Nc_coxI 370 I V W A I I M M I V G I E V D I R A Y E S A M I I M I A I P G T K I F N W I G I Y M A G H M S T R T V D L W A A I S E
4 Tg_coxI 370 I V W A I I M M I V G I E V D I R A Y E S A M I I M I A I P G T K I F N W I G I Y M A G H N T R T M D L W A A I S E

1 Pf_coxI 430 M C T E T F G G T I G V M L G N A I D V A L H D T Y Y V I A H F H E V L S I G A I I G L F T T V S A P Q D N F F G -
2 Et_coxI 430 I F L E T L G G T I G V V I L G N T A L D V A L H D T Y Y V I A H F H E V L S I G A V I G L I C G F F Y E Q S M F G Y I
3 Nc_coxI 430 V L L F T L G G T I G V M G N A G M D I A L H D T Y Y I V A H F H E V L S I G A V I A T M C G E I F Y S K D M F G D T
4 Tg_coxI 430 I L L F T L G G T I G V M G N A G M D I A L H D T Y Y I V A H F H E V L S I G A I A T M C G E V F Y S K D M F G D T

1 Pf_coxI 490 - - - - - K N L R I N S I V M S S M I F V G V M I T F A M H F I G N V M P S R I P D Y P P I A N G W M I C S I
2 Et_coxI 490 A N V F R N T S D P P Y I V W S I N V H F S I I T T A M B L I G N V M P S R S M D Y P P V Y T I N T M I C S I
3 Nc_coxI 490 V N L F H V N S G S S P Y I I W F V A L U A S I M I I F P M H M I G N V M P S S I P D Y P P V I C Y I N T W C S
4 Tg_coxI 490 L N L F H V N T G S S P Y I I W F V A L U A S I M I I F P M H M I G N V M P S S I P D Y P P V I C Y I N T W C S

1 Pf_coxI 495 G S I T M I I F G L I I F K *
2 Et_coxI 495 G S I S V F I I Y S L I L *
3 Nc_coxI 495 G S I S V I I I L T M L C *
4 Tg_coxI 495 G S I S I M I I I I L T M L C *

```

## C) Cytochrome oxidase III

```

1 Pf_coxIII 1 F I I F S N L S N I K A H L V S Y P A L T S L Y G T S L K Y F S V G I L F T - F N P I I L L I F M Y S I R E S F Y
2 Et_coxIII 1 M W L N F Y K N L V S N C S Y L R I F T K I S F L Y A T T L R Y E T V G F L F S P F L F T V F L L F N F T F R E V G T
3 Nc_coxIII 1 M I A V H H H P T G L I K T A K S V G F Q Y P T T L R L F H I G Y V L G - V I Y G L L L S L M L T A R E N Y Y
4 Tg_coxIII 1 M I A V H H H P T G L I K T A K S V G F Q Y P T T L R L F H I G Y V L G - V I Y G L L L S L M L T A R E N Y Y

1 Pf_coxIII 60 S V F S S L T S G M L S I I I S E A L L F F T Y F W G I L H F S L S P Y P L S N - - - - - E G I I I T S S R M L I
2 Et_coxIII 60 T S A S M V S S I C L G V I S T E L L L F V S F F W G A Y S S I L S P S Y V I D T T L F S P T E G L V S I S S R G L I
3 Nc_coxIII 60 S D A S M I S T I V L G V I L S E T G L F I S F F W G V Y T T - - - - - S W T I G L D L - - - - - E C L C L P D P S S I V
4 Tg_coxIII 60 S D A S M I S T I V L G V I I S E T G L F I S F F W G V Y T T - - - - - S W T I G L D L - - - - - E G L C L P D P S S I V

1 Pf_coxIII 120 L T I T F I L A S A S C M T A C L Q V F I E K G M S F E I S S I C I I Y L L G E C F A S L Q T T E Y L H L S Y H I N
2 Et_coxIII 120 V T I T F L L S T A S V I L G Y G A L T S E K A I N L N I Q K G F L S I V I T A L C F T S I Q V C E Y L G L A I S I N
3 Nc_coxIII 120 L F M T I M L S A L S I V S S V Y L - - - K N Q H L Y T S C T N I M I F T L V M S F L M I V C T E Y L G L S I Y I N
4 Tg_coxIII 120 L F M T I M L S A L S I V S S V Y L - - - K N Q H L Y T S C T N I M I F T L V M S F L M I V C T E Y L G L S I Y I N

1 Pf_coxIII 180 D T V Y T T L F Y C V T G L H F S H V V I G L L L I I Y - - F I R I E I Y D T S T E W F I N S F G I S Y I - V I P
2 Et_coxIII 180 D G V L G T Y L L W I T G L H F S H V L V G A I L L F F T - - F W R G S L Q Y N V N T Q - - I R T Y N S S S I M V L P
3 Nc_coxIII 180 D N G F G N G L F I L T G I H F S H V I V G A I L G F F N Q S I Y S S L V T Y L P T N C - - I S L S K C K G T L C K I
4 Tg_coxIII 180 D N G F G N G L F I L T G I H F S H V I V G A I L G F F N Q G M Y S S L V T Y L P V N C - - I T L S K C K G T L C K I

1 Pf_coxIII 240 H T D Q I T I L Y W H F V E I I W F I E F L F Y S E *
2 Et_coxIII 240 M L E S Y T L V Y W H F V E A I W L V I H F T F Y I T L *
3 Nc_coxIII 240 F S E P F T I L Y L H F V E A V W I M I H V T F Y L *
4 Tg_coxIII 240 F S E P F T I L Y L H F V E A V W I M I H V T F Y L *

```

## D) Cytochrome B

|           |       |       |          |           |             |             |             |           |             |             |             |            |
|-----------|-------|-------|----------|-----------|-------------|-------------|-------------|-----------|-------------|-------------|-------------|------------|
|           | 1     | 10    | 20       | 30        | 40          | 50          | 60          | 70        | 80          | 90          | 100         | 110        |
| 1. Pf_cob |       |       | ATGAAC   | TTTTACTCT | ATTAATTTAGT | TTAAAGCACAC | TTAATAAATAC | CCCATGTC  | ATTGAACATAA | CTTTTTATGGA | ATTACGGATTC | TTTTAGG    |
| 2. Et_cob |       |       |          |           | ATGTC       | CAAGTGAGAT  | CTCACCTACA  | ACATATCC  | ATGTC       | CAACCAAT    | ATGAAC      | TTCTTTAGG  |
| 3. Nc_cob |       |       | ATGGTTTC | GAGAACACT | CAGTATATCC  | ATGAGTCTAT  | CCGGGCAC    | ACCTTGCT  | TTTATCGGT   | GTGCTCTAA   | ATCTAAAT    | TCATCTTATA |
| 4. Tg_cob |       |       | ATGGTTTC | GAGAACACT | CAGTCTATCT  | ATGAGTCTAT  | CCGGGCAC    | ACCTTGCT  | TTTATCGGT   | GTGCTCTAA   | ATCTAAAT    | TCATCTTATA |
|           | 120   | 130   | 140      | 150       | 160         | 170         | 180         | 190       | 200         | 210         | 220         | 230        |
| 1. Pf_cob |       |       | TATTTTTT | ATTCAAATT | TAAACAGGT   | GTATTTTTAG  | CAAGTCGAT   | ATACACCAG | ATGTTTCAT   | ATGCATATT   | ATAGTATACA  | ACACATTTT  |
| 2. Et_cob |       |       | CTTTTGT  | TGTC      | CAAAATT     | GTAAACAGG   | ATTATTATG   | ACATCTAG  | ATATACTAG   | TGAAATG     | TGCACAT     | GCCTTTG    |
| 3. Nc_cob |       |       | CTTTTGT  | TGTC      | CAAAATT     | GTAAACAGG   | ATTATTATG   | ACATCTAG  | ATATACTAG   | TGAAATG     | TGCACAT     | GCCTTTG    |
| 4. Tg_cob |       |       | CTTTTGT  | TGTC      | CAAAATT     | GTAAACAGG   | ATTATTATG   | ACATCTAG  | ATATACTAG   | TGAAATG     | TGCACAT     | GCCTTTG    |
|           | 240   | 250   | 260      | 270       | 280         | 290         | 300         | 310       | 320         | 330         | 340         |            |
| 1. Pf_cob |       |       | TTTTAG   | ATACAT    | GCACG       | CAACAGG     | TGCTTCTCT   | TGTATTTT  | ATTAACAT    | ATCTTCAT    | ATTTTAA     | GAGGATTA   |
| 2. Et_cob |       |       | ATTTAG   | ATTTCT    | ACATG       | CAACTGG     | AGCATCT     | CGCTATT   | CTCTGT      | CTATTTCT    | TCATATTT    | TCGAGCT    |
| 3. Nc_cob |       |       | ATTTAG   | ATTTCT    | ACATG       | CAACTGG     | AGCATCT     | CGCTATT   | CTCTGT      | CTATTTCT    | TCATATTT    | TCGAGCT    |
| 4. Tg_cob |       |       | ATTTAG   | ATTTCT    | ACATG       | CAACTGG     | AGCATCT     | CGCTATT   | CTCTGT      | CTATTTCT    | TCATATTT    | TCGAGCT    |
|           | 350   | 360   | 370      | 380       | 390         | 400         | 410         | 420       | 430         | 440         | 450         | 460        |
| 1. Pf_cob |       |       | GGATTG   | ATTTTAT   | TATGAT      | ATTTATT     | GTAACT      | GTCTTCT   | CGTGGT      | TATGTC      | TTACCAT     | GGGGTCAA   |
| 2. Et_cob |       |       | GGATTG   | ATTTTAT   | TATGAT      | ATTTATT     | GTAACT      | GTCTTCT   | CGTGGT      | TATGTC      | TTACCAT     | GGGGTCAA   |
| 3. Nc_cob |       |       | GGTTT    | AGTTTTAT  | ATCTACT     | TACTATAG    | CCACTG      | CCCTCT    | CGGATAT     | GTA         | CTACCAT     | GGGGTCAA   |
| 4. Tg_cob |       |       | GGTTT    | AGTTTTAT  | ATCTACT     | TACTATAG    | CCACTG      | CCCTCT    | CGGATAT     | GTA         | CTACCAT     | GGGGTCAA   |
|           | 470   | 480   | 490      | 500       | 510         | 520         | 530         | 540       | 550         | 560         | 570         |            |
| 1. Pf_cob |       |       | CAGTAG   | CAGTA     | ATTTGG      | ATATG       | TGGAGG      | ATATACT   | GTGAGT      | GTCTCT      | CAATAA      | ACGATTTT   |
| 2. Et_cob |       |       | CATACCT  | TTGTA     | ACTTGG      | TACTAG      | GAGGTTT     | CTATG     | TGGATA      | ATCTCT      | ACCTTAA     | AAAGGATTT  |
| 3. Nc_cob |       |       | CATATTT  | GGTAC     | CTTGG       | CTACTGG     | GAGGAT      | ACTAGT    | ATCTGAT     | GTAA        | CAATTA      | AAACGATTT  |
| 4. Tg_cob |       |       | CATATTT  | GGTAC     | CTTGG       | CTACTGG     | GAGGAT      | ACTAGT    | ATCTGAT     | GTAA        | CAATTA      | AAACGATTT  |
|           | 580   | 590   | 600      | 610       | 620         | 630         | 640         | 650       | 660         | 670         | 680         | 690        |
| 1. Pf_cob |       |       | TATATTT  | TTCTTAC   | ATTTAC      | ATGGTAG     | CAAAATC     | CTTTAG    | GGTATG      | ATACAG      | CAATTA      | AAAGGATTT  |
| 2. Et_cob |       |       | TATTTT   | CTATCT    | ACATCT      | AAACGG      | ATCTAG      | TAAACCC   | CTGAGG      | TATAG       | TACCG       | CGCTTAA    |
| 3. Nc_cob |       |       | TATTTT   | CTATCT    | ACATCT      | AAACGG      | ATCTAG      | TAAACCC   | CTGAGG      | TATAG       | TACCG       | CGCTTAA    |
| 4. Tg_cob |       |       | TATTTT   | CTATCT    | ACATCT      | AAACGG      | ATCTAG      | TAAACCC   | CTGAGG      | TATAG       | TACCG       | CGCTTAA    |
|           | 700   | 710   | 720      | 730       | 740         | 750         | 760         | 770       | 780         | 790         | 800         |            |
| 1. Pf_cob |       |       | ATAATTT  | TTATTT    | CTAATA      | CAAGTTT     | ATTTGGA     | ATTATAC   | CTTTAT      | CACATCT     | CGATAAT     | GCTATCG    |
| 2. Et_cob |       |       | ATCTTAT  | TCCTAT    | TAGTCA      | ATCTCT      | CGGTCT      | AAATGA    | ATTATAC     | ATCCAG      | ATATTC      | CTGTAAT    |
| 3. Nc_cob |       |       | ATTGGAT  | TAACTCT   | TACAAG      | CGGCTTT     | CGGTTG      | TATGGA    | ACTTTT      | CACACCC     | AGATAA      | CTCATACC   |
| 4. Tg_cob |       |       | ATTGGAT  | TAACTCT   | TACAAG      | CGGCTTT     | CGGTTG      | TATGGA    | ACTTTT      | CACACCC     | AGATAA      | CTCATACC   |
|           | 810   | 820   | 830      | 840       | 850         | 860         | 870         | 880       | 890         | 900         | 910         | 920        |
| 1. Pf_cob |       |       | TTCTAC   | CAATTT    | ATGCA       | ATGTTAA     | AAACTG      | TTTCA     | AGTAA       | ACCAG       | CGTGGT      | TATGTA     |
| 2. Et_cob |       |       | TTCTAG   | CATATT    | ATGCT       | ATCTTAA     | AAAGTAT     | TTC       | CAAGTAA     | AACTGG      | AGGTC       | CTATTAC    |
| 3. Nc_cob |       |       | TTCTAG   | CATATT    | ATGCT       | ATCTTAA     | AAAGTAT     | TTC       | CAAGTAA     | AACTGG      | AGGTC       | CTATTAC    |
| 4. Tg_cob |       |       | TTCTAG   | CATATT    | ATGCT       | ATCTTAA     | AAAGTAT     | TTC       | CAAGTAA     | AACTGG      | AGGTC       | CTATTAC    |
|           | 930   | 940   | 950      | 960       | 970         | 980         | 990         | 1,000     | 1,010       | 1,020       | 1,030       |            |
| 1. Pf_cob |       |       | TATAATT  | CAATTT    | AAATG       | ATTTTGG     | TGCTAG      | AGATTAT   | CTGTCT      | CTTTT       | ATTATG      | GATTTGG    |
| 2. Et_cob |       |       | TGTAATA  | AACTTAC   | GACAACA     | ATTCTCT     | CAAGAA      | ATTG      | GCAACAT     | CTTGG       | GATTTAT     | CTATCT     |
| 3. Nc_cob |       |       | CCGAAT   | GTTGAT    | CTGCA       | CAATTTAT    | GACTCG      | AAATG     | ATGTC       | AGTGG       | ATGGG       | TATATG     |
| 4. Tg_cob |       |       | CCGAAT   | GTTAAT    | CTGCA       | CAAGTTT     | GACTCG      | AAATG     | ATGTC       | AGTGG       | ATGGG       | TATATG     |
|           | 1,040 | 1,050 | 1,060    | 1,070     | 1,080       | 1,090       | 1,100       | 1,110     | 1,120       | 1,130       | 1,140       | 1,149      |
| 1. Pf_cob |       |       | ATATT    | CATTTT    | ATATG       | TCGATTT     | ATTTATG     | TATATTT   | CTGTAG      | TGGTTT      | ATTTG       | TACTTGT    |
| 2. Et_cob |       |       | GTATTT   | ATTTT     | CATATG      | GTAGAT      | CTTTTAC     | CGTAAT    | CTATCT      | TTTAA       | GTACAT      | TTAGTTT    |
| 3. Nc_cob |       |       | ACTT     | ACATCT    | TATATG      | TAGACT      | AGCTACT     | ATCTTAT   | ATCTTACT    | ACCGA       | TTGGTACT    | ATGCTTACT  |
| 4. Tg_cob |       |       | ACATAC   | ATCTTAT   | GGTAG       | ATTAGCT     | ACTATCT     | TATACCT   | TACTAC      | CGGAT       | TGGTTCT     | ATGCTTACT  |

### E) Cytochrome oxidase I

[illegible]

### F) Cytochrome oxidase III

1 10 20 30 40 50 60 70  
1. Pf\_coxIII TTTATTTTATTGATGAATTTATCAAAATATAAAAGCACATCTAGTTTCATATCCTGCATTAAACATCA  
2. Et\_coxIII ATTTTGACCTCAATTTTATATAAAAAATTTAGTATCAAAATGCTCATTTTAAAGAAATTTTATCAAAAAATTTCTTTC  
3. Nc\_coxIII ATGATTGCTGTACACACACCACCCACTGGACTGCTTAAGACAGCTATAAAGTGTTGGATTTT  
4. Tg\_coxIII ATGATTGCTGTACACACACCACCCACTGGACTGCTTAAGACAGCTATAAAGTGTTGGATTTT

80 90 100 110 120 130 140 150  
1. Pf\_coxIII TTATATGGTACATCTTTAAAATACCTTTTCTGAGGATATATTTTACA---TTTAAACCTATAATCTCTATTA  
2. Et\_coxIII TTATATGCTACTACATTAAGATATTTCCACTGTTGGTTTCTTATTTTCTCCATTCTCTATTATGTTATCTTA  
3. Nc\_coxIII CCAATCTCTACTACATTAAGGTTATTTCCACATCGGTTATGTTCTAGGC---GTAATATATGGAATTCGTTT  
4. Tg\_coxIII CAATATCTCTACATTAAGGTTATTTCCACATCGGTTATGTTCTAGGC---GTAATATATGGAATTCGTTT

150 160 170 180 190 200 210 220  
1. Pf\_coxIII ATATTGTTCATGCTATTTTACGAGAAGTTTATTTCTGATATTTTCTTTAACTCTGGGATATCTATCTC  
2. Et\_coxIII CTCTTCAATTTCCACATTCAGAGAAGTTTGGTACACATCAGCCTCATATGGTATCTTCAATATGTTTAGGTGTT  
3. Nc\_coxIII TCACCTCGTAATTCAGGACGAGAGAAGAACTACATCAGATGCTAGTATGATCAGTACCATCGTATCGGAGT  
4. Tg\_coxIII CTCTCGTAATTTACGAGGACGAGAGAACTACTACATCAGATGCTATGATGACAGTACCATCGTATCGGAGT

220 230 240 250 260 270 280 290  
1. Pf\_coxIII ATAATTTCAGAAGCTTTATTTATCTTACATATTTTGGGGTATATACATTTTAACTTTTATCCACATATCCA  
2. Et\_coxIII ATTAGACTCTGAGTTACTATTTATCTGTTAGTTTCTCTGGGGTGATATTTCCAGATCTCTATCCACCTAGTAT  
3. Nc\_coxIII ATACTCTCTGAGACAGGATATTTATAAGCTTTTCTCTGGGGATATATACATCG-----AGTTGG  
4. Tg\_coxIII ATACTCTCTGAGACAGGATATTTATAAGCTTTTCTCTGGGGATATATACATCG-----AGTTGG

290 300 310 320 330 340 350 360  
1. Pf\_coxIII TTAAGTAAT-----GAAGGTTATCTACTTCTCATCAAGAATGTTTAATCTTAACA  
2. Et\_coxIII GTACACAGATACATCTCTGTTTCAGTCTCTACTGAAGTCTTGAAGTATCAAGTAGAGGCTTATTTGTAATCT  
3. Nc\_coxIII ACTACTCGTTTAACTCTT-----GAATGCTTTTATACCGGATCCAAAGTCTATTGTGCTTTTC  
4. Tg\_coxIII ACTACTCGTTTAACTCTT-----GAAGTCTTTTATACCGGATCCAAAGTCTATTGTGCTTTTC

360 370 380 390 400 410 420 430  
1. Pf\_coxIII ATTACATTTTATAGTCAATGCTACATGATGCTGCATGTTTACAAGTATTTAGAAAAGGAAGATGAT  
2. Et\_coxIII ATTACATTTTCAATCTCCATCTGCTAGTGTTATTTCTGGGTTATTTGGTGCTCTAACCTCAGAAAAGGCTATAAAC  
3. Nc\_coxIII ATGACATTTATGTTAAGTGCATTAAGTATAGTGGGTGCAGCGTATATTTG-----AAAAACAACAT  
4. Tg\_coxIII ATGACCTCATGTTAAGTGCATTAAGTATAGTGGGTGCAGCGTATATTTG-----AAAAACAACAT

430 440 450 460 470 480 490 500  
1. Pf\_coxIII TTGGAATCTCTAGTATTTATTTGTATAATATCTATTAGGAGAATGTTTGGCATCTCTACAACATCAGAG  
2. Et\_coxIII TTGAAATCTCAAAAAGGTTTCTCTCTAGTTTATTTATGGCTCTATGCTCTTCTCTAGTATCAAGTTTGTGA  
3. Nc\_coxIII TTGATATCAAGTGCTTCAAGTATGATATCAAGTATCAAGTATGTTGATATGTTGATGTTGTTGTA  
4. Tg\_coxIII TTATACACAGATCTGCAATATCATGATATTAACITTTGGTATCTCTCTCTGTTGTTGTTGTA

500 510 520 530 540 550 560 570  
1. Pf\_coxIII TATTTACATTTATCATATCATATAAATGATACGTGATATATACATCATTTTATTTGTTGTACAGGATTACAT  
2. Et\_coxIII TTTATAGGACTGGCAATATCTATTAATGATGGAGTTTTAGGTACCTATCTCATTTGGATTACAGGATTACAC  
3. Nc\_coxIII TATACACACATATCTGTTATTTATGTTGCTGAGTATGATCAAGTATGTTGATATGTTGATATGTTGAT  
4. Tg\_coxIII TACTTTGCTCTACTTTATTTATTAACGATAATGGATTTGGTATAGGTCTATTTTATCTTACTTCTGTATACAT

570 580 590 600 610 620 630 640  
1. Pf\_coxIII TTTTCTCATGTAGTAAAGGTTTATTTATTTAATAAATATCA-----TTTATAAGAATAATAGAAATAT  
2. Et\_coxIII TTTCTCAGATGTGCTAGTAGGTGCTATACTATCTTCTTCA-----TTCTGGAGAGGTAGTTTACCAAT  
3. Nc\_coxIII TTTCAATTTTATGCTATGTTGCTGATGATGATGGAATGGAATGTTGATATGTTGATATGTTGATATGAT  
4. Tg\_coxIII TTCAGTCTATGTTATTTGCTGGTCTACTTTGGGTTCTTTTAAATCCGGGTATGTAGTCTTCTATGTTACATAT

640 650 660 670 680 690 700 710  
1. Pf\_coxIII GATACCTCTACCGAATGGGTTTATAAAATCTTCTGGGATATCATATATT---GTTATACCTCACACTGATCA  
2. Et\_coxIII AATGTAAATACCCAA-----ATTTCGAACATATAATCTTCTAGCATATGTTATACCTATACCTGTAGTAATCA  
3. Nc\_coxIII TTTCAATTTTATGCTATGTTGCTGATGATGATGATGATGATGATGATGATGATGATGATGATGATGATGAT  
4. Tg\_coxIII TTAACGAGTAAATCG-----ATAACTTTGGATTAATGCAAAAGGTACATTTGTAAATCTTCTCAAGAACCA

710 720 730 740 750 760 770 780  
1. Pf\_coxIII ATTACAAATTTATATGGCATTTTGTGGAATAATCTGGTTATTTATAGAGTTCTTATTTCTATTCCAGAATA  
2. Et\_coxIII TACACTCTAGTATACCTGGCATTTTGTAGAAGATCTGTGGTTAGTATACCTTACTTTCTTACTACTATATA  
3. Nc\_coxIII TTTCAATTTTATGCTATGTTGCTGAGGAGTGGTGGATATGATCCAGCTATACCTTCTACTTCTCTAA  
4. Tg\_coxIII TTTCAATTTTATGCTATGTTGCTGAGGAGTGGTGGATATGATCCAGCTATACCTTCTACTTCTCTAA

780 790 792  
1. Pf\_coxIII

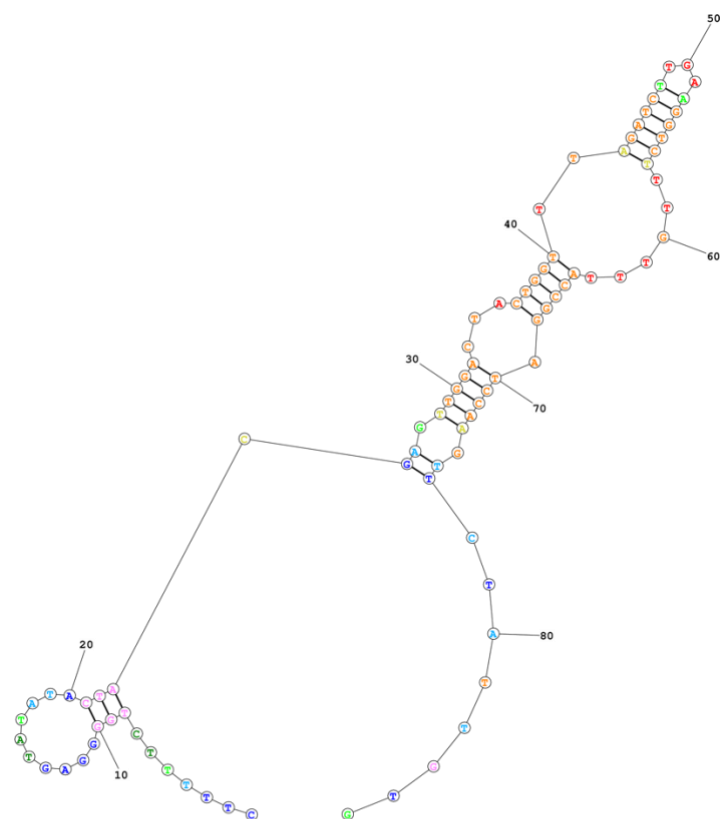

Probability >= 99%  
 99% > Probability >= 95%  
 95% > Probability >= 90%  
 90% > Probability >= 80%  
 80% > Probability >= 70%  
 70% > Probability >= 60%  
 60% > Probability >= 50%  
 50% > Probability  
 ENERGY = -16.4 J

**Fig. S8 - Secondary structure of *T. gondii* sequence block J.** Structure analysis was performed with RNA structure Web Servers for RNA Secondary Structure Prediction. The Mathews Group. <https://rna.urmc.rochester.edu/RNAstructureWeb/Servers/Predict1/Predict1.html>  
 Settings: MaxExpect partition.pfs MaxExpect.ct --gamma 1 --percent 10 --structures 20 --window 3

Fig. S9 - Multiple sequence alignment of a subset of uncorrected Nanopore reads from the ENU mutant strain ELQ-316. The wt *T. gondii* RH sequence is on the first row. The mutant sequence is on the second row. The mutation, which is an A -> C, is located at position 23.

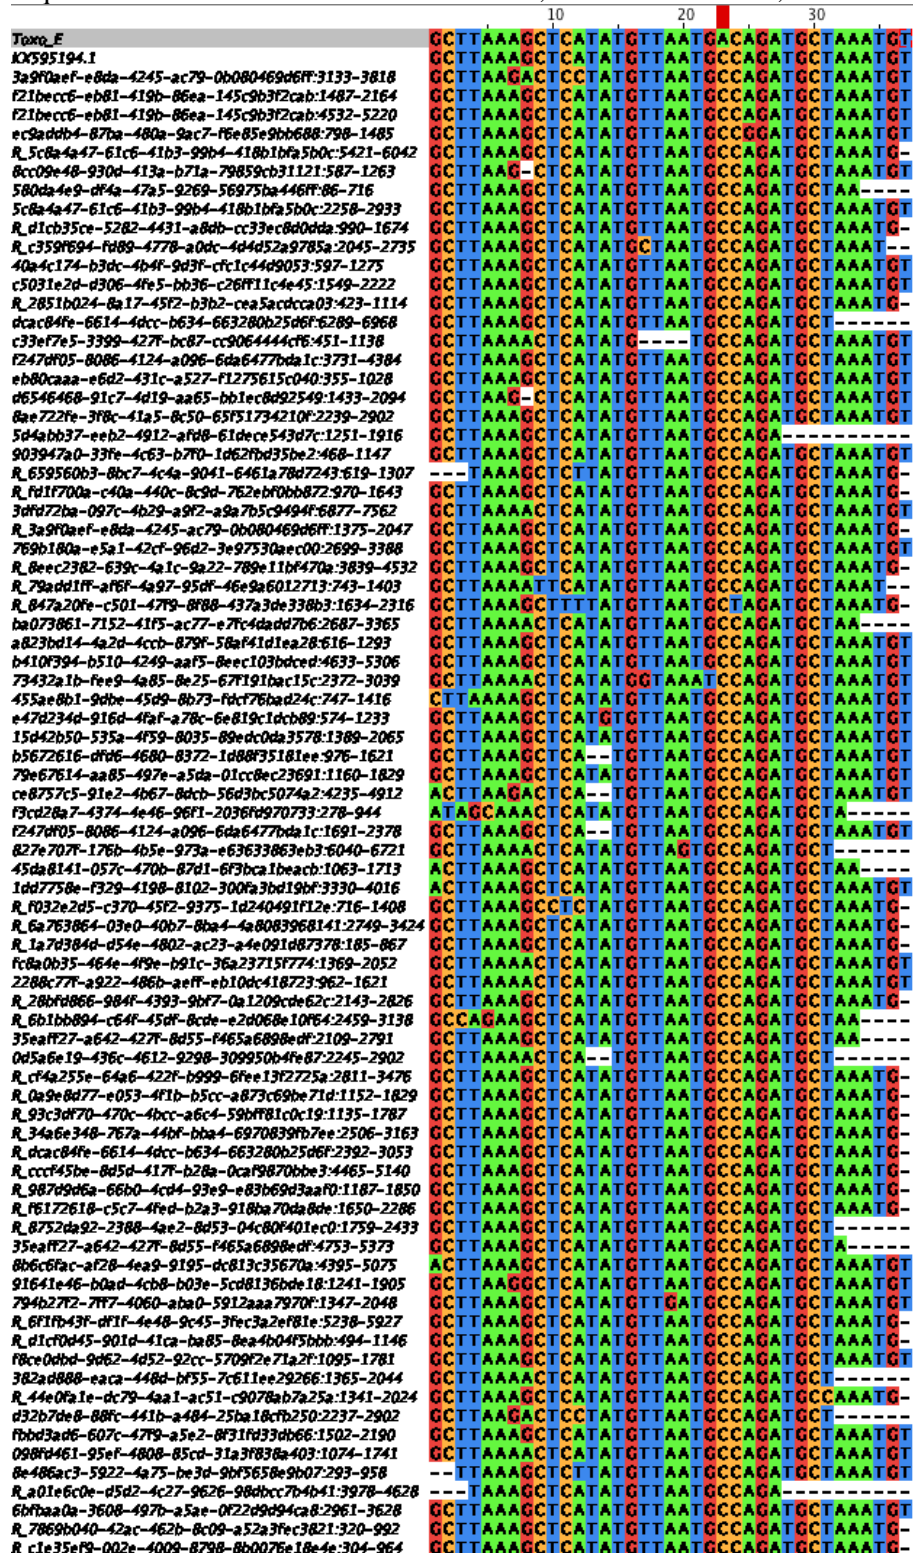

Fig. S10 – Annotated *Neospora caninum* mtDNA Nanopore reads (2-15 kb) arranged by length

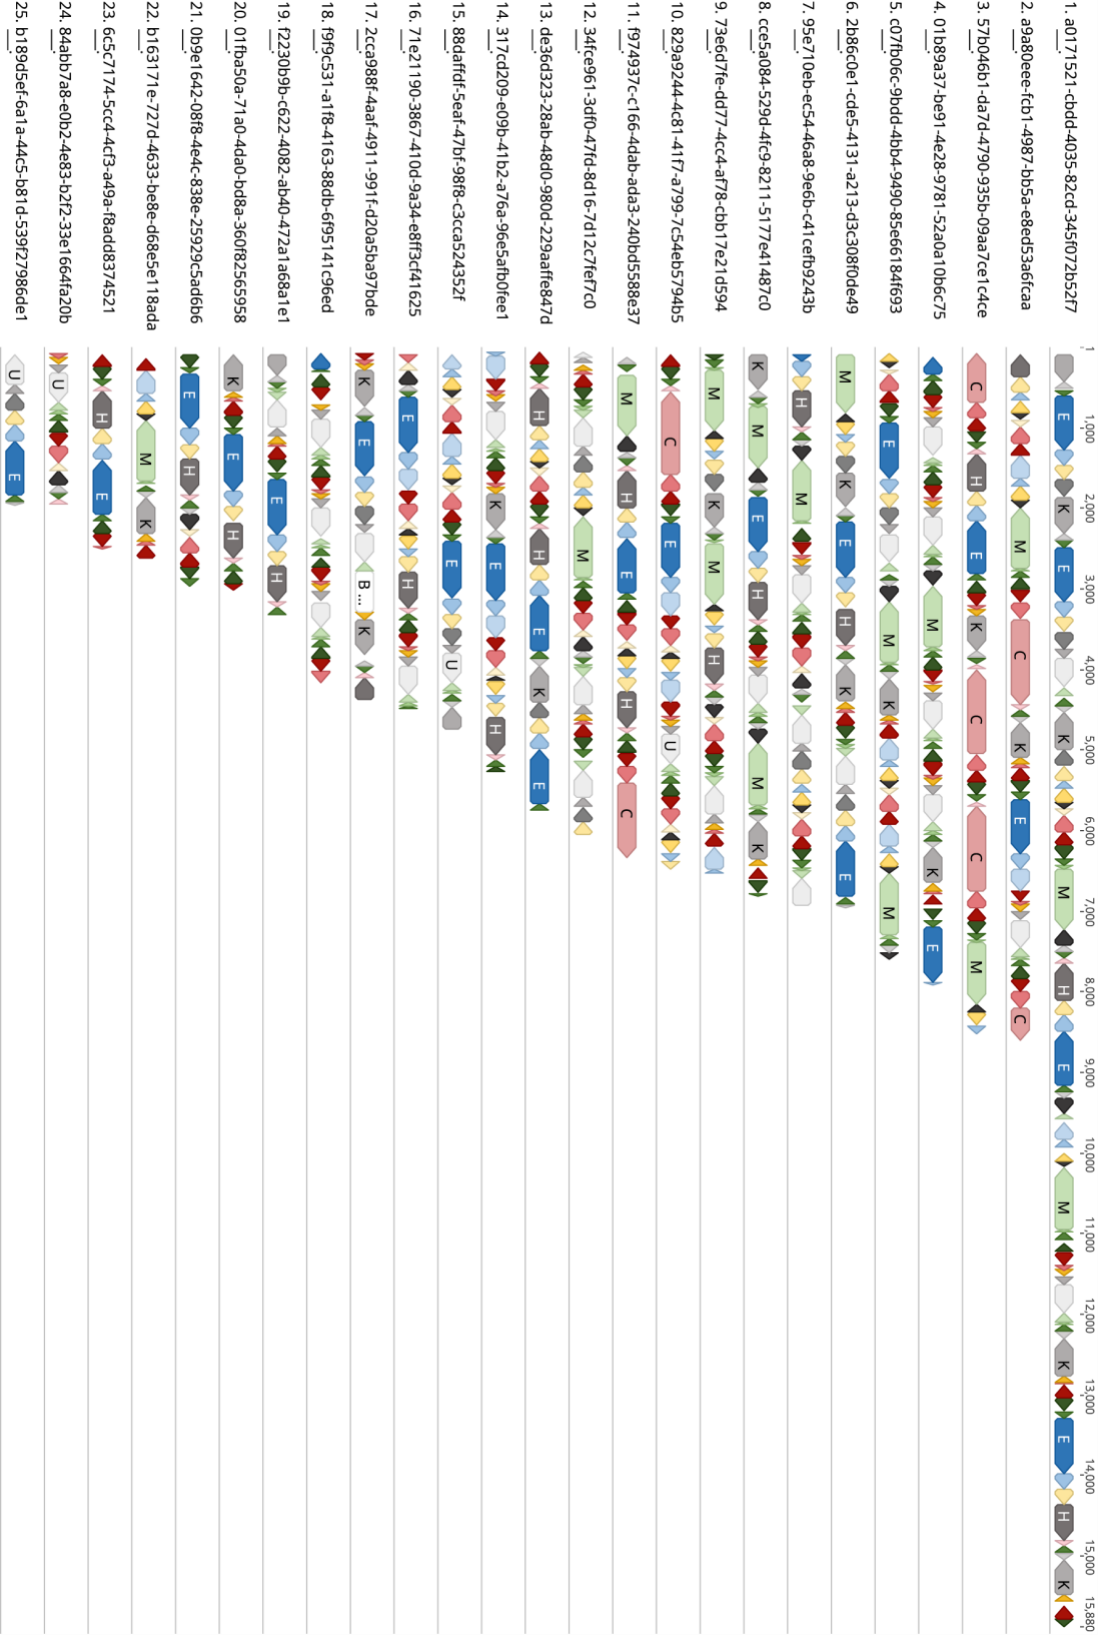

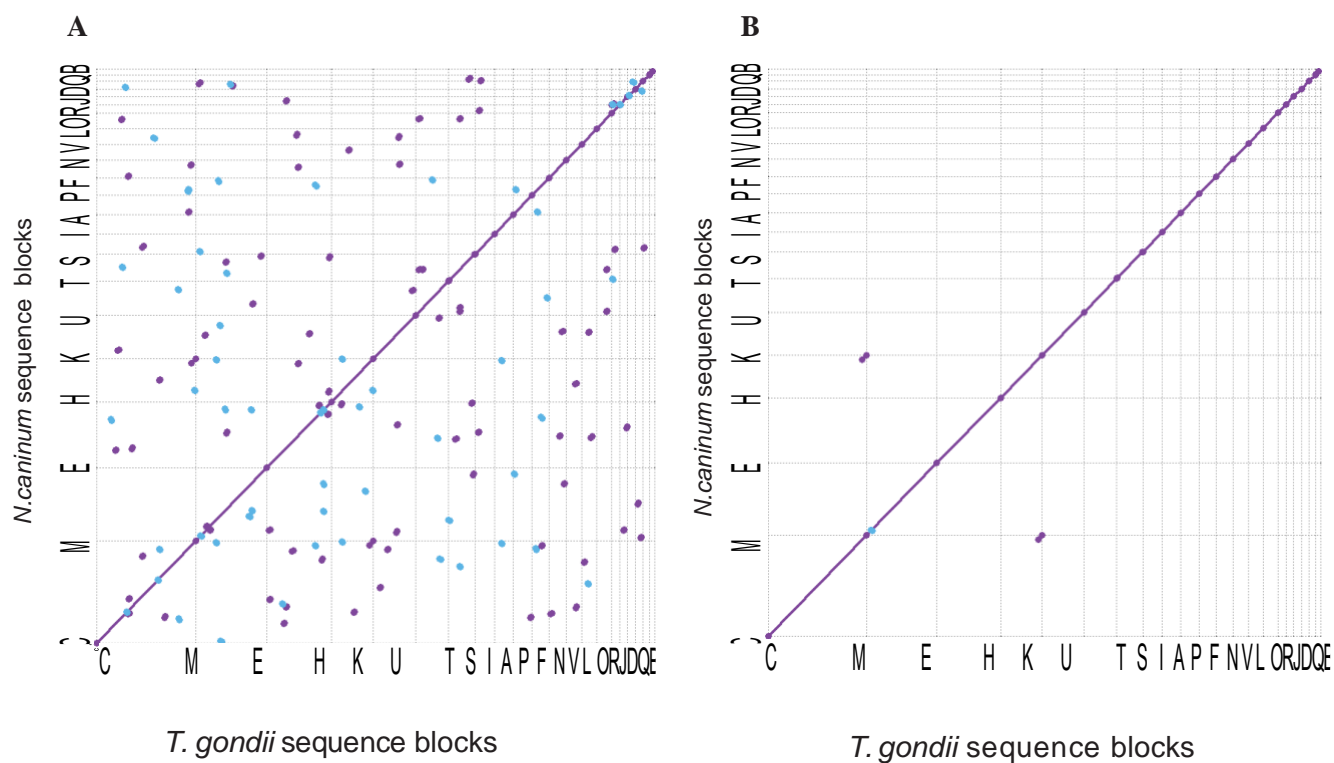

**Fig. S11 - Dot plot comparisons of *T. gondii* ME49 and *N. caninum* Nc-1 sequence blocks to detect microhomology.** (A-B) The 21 *T. gondii* mtDNA SBs were aligned to the 21 mtDNA blocks from *N. caninum*. Matches detected with window sizes of 10 bp in (A,) and 15 bp in (B) are displayed in blue or purple for forward and reverse matches respectively.



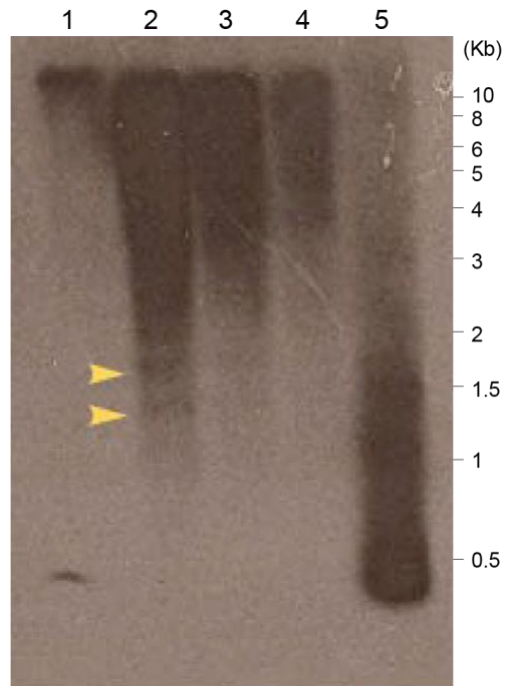

**Fig. S13 - *T. gondii* mtDNA is variable in size and does not exist as a tandem repeat unit.** Southern blot analysis. Total DNA from the *T. gondii* RH strain was hybridized to a 350 bp *coxI* probe under very stringent conditions. Lane 1: Undigested 2 µg genomic DNA; 2: *XhoI* Digested 15 µg genomic DNA; 3: *XhoI* Digested 5 µg genomic DNA; 4: *XhoI* Digested 2 µg genomic DNA; 5: positive control 350 bp probe fragment. *XhoI* cuts only once in the mitochondrial SBs, it cuts inside sequence block E of the *cob* gene. The yellow arrows point to distinct bands (~1.65 and 1.35 kb) on the blot. Size markers are indicated.

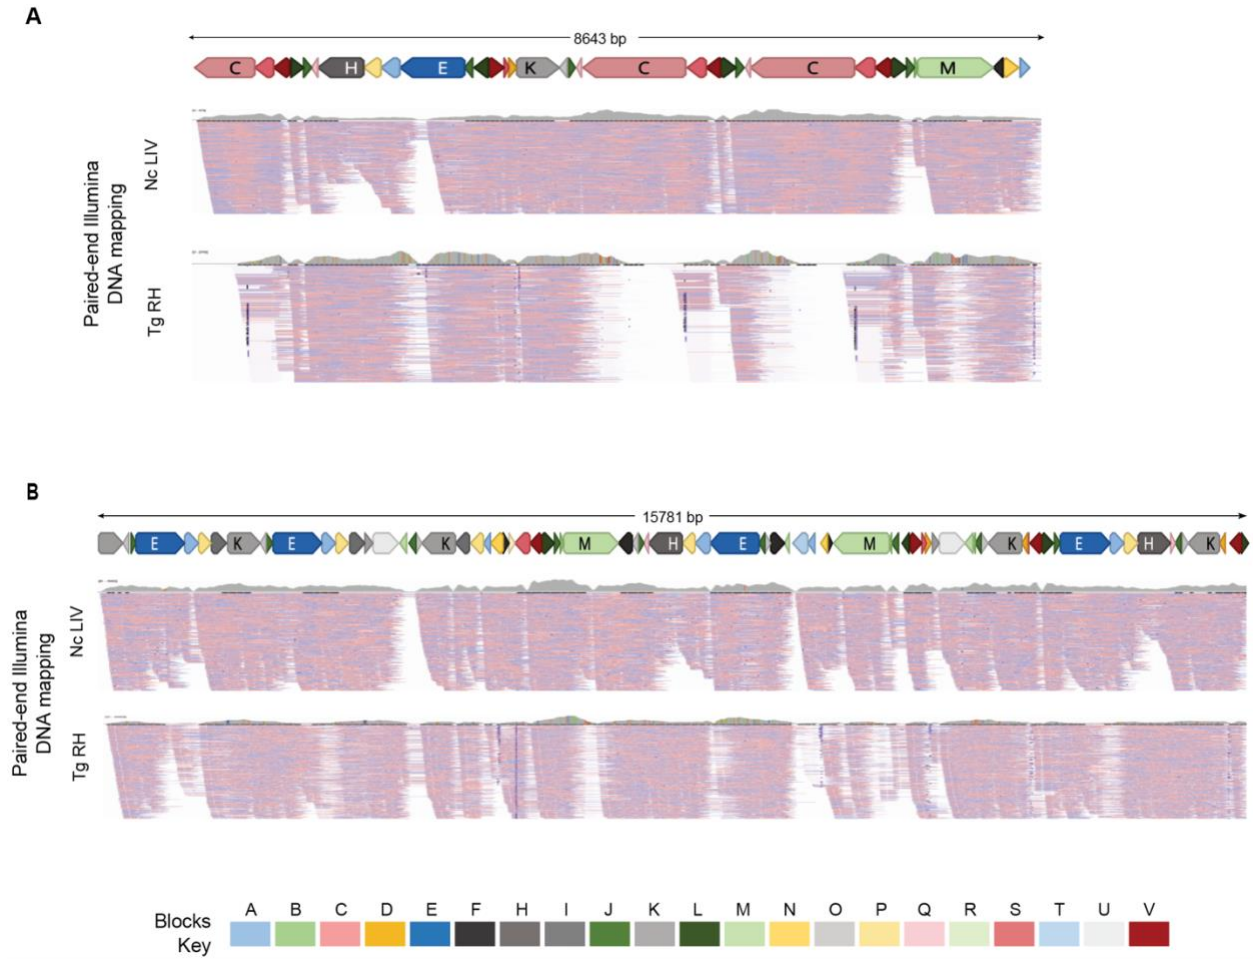

**Fig. S14 - *N. caninum* nanopore sequence comparison and degeneration.** (A-B) SBs were annotated on two *N. caninum* Nc-1 nanopore sequences reads at scale. The blocks are colored as shown in the key at the bottom of the figure. The two ‘Paired-end Illumina DNA mapping’ tracks show paired-end read mapping of *N. caninum* (Nc) LIV (ERR012900) and *T. gondii* (Tg) RH (SRR521957) mtDNA-specific reads. Mapping of Nc LIV reads required 100% nucleotide identity whereas 1% mismatch was allowed for mapping *T. gondii* RH reads. Reads were independently mapped to each of the Nanopore mtDNA reads and visualized using IGV. Red and blue lines below each read indicate the mapped Illumina paired-ends.

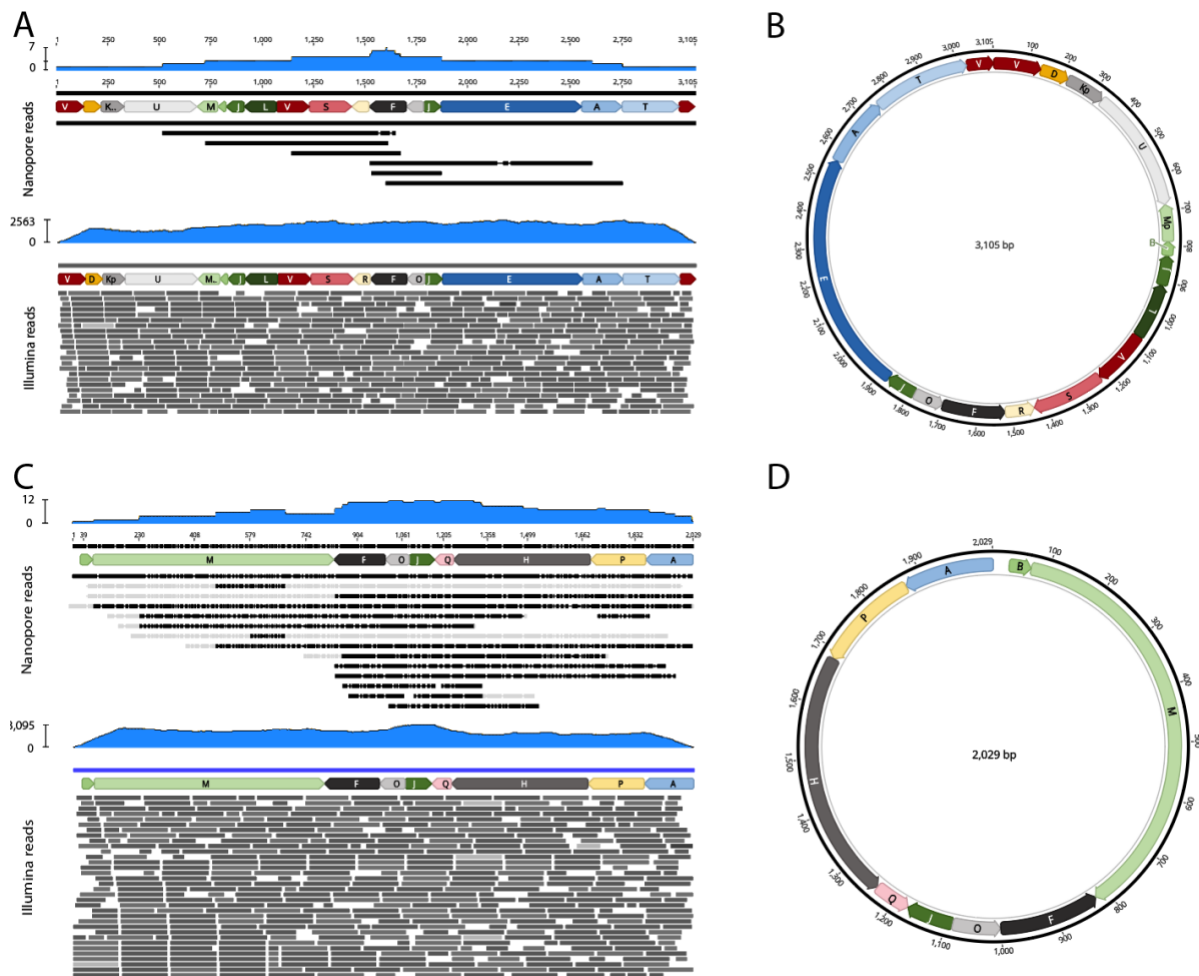

**Fig. S15 - Nanopore and Illumina support for possible circular structures.** (A, C) Mapped tracks of TgME49 Nanopore (top panels) and TgME49 Illumina reads (bottom panels) to single Nanopore reads identified as possibly existing as circular molecules according to Circlator predictions (B, D). Note the presence of the *cob* gene blocks EAT in panel B. Mapping of single and paired-end Illumina reads was permitted. Not all mapped reads are shown. The depth of read mapping is indicated above each panel in blue. The portions of Nanopore reads that are greyed out in panel C do not map to the annotated Nanopore read above. Additional predictions some of which encode the remaining cytochrome genes are provided in Supplemental Fig. S16.

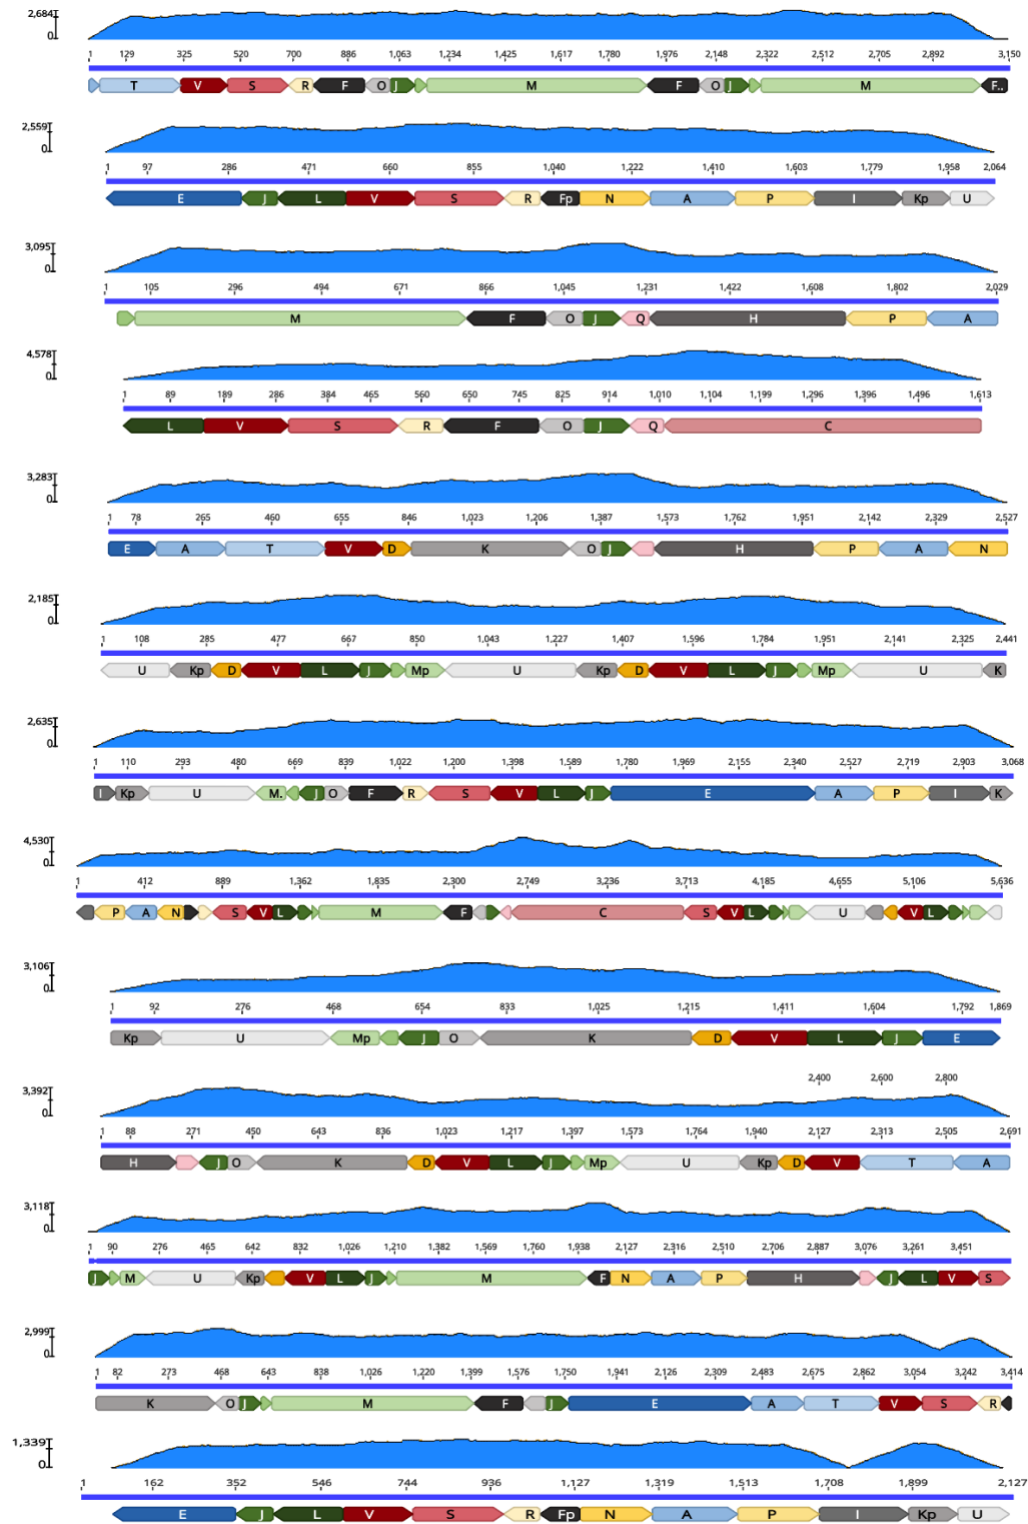

**Fig. S16 - Nanopore reads predicted to circularize.** *T. gondii* ME49 Illumina mapping frequency support for predicted circular sequences. Mapped read counts are displayed above each Nanopore read in blue. Some reads show fairly uniform coverage and others do not. Scale is as indicated for each read. Full-length cytochrome genes are observed.
