# Supplementary material for: A novel fragmented mitochondrial genome in the protist pathogen Toxoplasma gondii and related tissue coccidia
Source: HighWire-hosted journal article supplement (doi:10.1101/gr.266403.120), 2021-04-27
Supplement: Supplemental_Methods.pdf [file Supplemental_Methods.pdf]

## Supplemental Methods

### A novel fragmented mitochondrial genome in the protist pathogen *Toxoplasma gondii* and related tissue coccidia

Sivaranjani Namasivayam<sup>a,b</sup>, Rodrigo P. Baptista<sup>b,c</sup>, Wenyuan Xiao<sup>a,b</sup>, Erica M. Hall<sup>a</sup>, Joseph S. Doggett<sup>d</sup>, Karin Troell<sup>e</sup> and Jessica C. Kissinger<sup>a,b,c,1</sup>

<sup>a</sup> Department of Genetics, University of Georgia, Athens, GA, 30602, USA

<sup>b</sup> Center for Tropical and Emerging Global Diseases, University of Georgia, 30602, USA

<sup>c</sup> Institute of Bioinformatics, University of Georgia, Athens, GA 30602, USA

<sup>d</sup> Division of Infectious Diseases, Oregon Health Sciences University, OR, 97239, USA

<sup>e</sup> Department of Microbiology, National Veterinary Institute, SE-751 89 Uppsala, Sweden

**Corresponding Author:** Jessica C Kissinger, University of Georgia, 500 D.W. Brooks Drive, Coverdell Center, Athens, GA, 30602, USA

[jkissing@uga.edu](mailto:jkissing@uga.edu), +1-706-542-6562

ORCID: 0000-0002-6413-1101

## SUPPLEMENTAL METHODS

**Multiple Sequence Alignment.** Predicted cytochrome sequences (nucleotide and amino acid) were compared to other apicomplexan mitochondrial proteins using MUSCLE (Edgar 2004) (Supplemental Fig. S7). The GenBank accession numbers are: *P. falciparum* (AAC63390.2, AAC63389.2, AAC63391.1) and *E. tenella* (BAJ25753.1, BAJ25754.1, BAJ25752.1) and their associated CDSs.

**DNA Electrophoresis and Southern Analysis.** Restriction digestion of *T. gondii* RH genomic DNA was performed with XhoI (New England BioLabs, Ipswich, MA) at 37°C and run on a 0.8% agarose (Sigma, St. Louis, Mo) gel with a 1 kb ladder (NEB, Ipswich MA) and positive control. The gel was then soaked in 0.25M HCl for 15min to depurinate and then denatured with 0.5M NaOH, 1M NaCl for 30min and neutralized with 1.5M Tris HCL, 3M NaCl, pH 7.4, twice, 15 min each, followed by over-night transfer to

a nylon membrane and UV fixation. Pre- and post- staining with ethidium bromide was used to examine successful transfer of DNA to the membrane. Blots were pre-hybridized in 30 ml hybridization solution (50% deionized formamide, 5X Denhardt's solution, 5X SSC, 0.1% SDS, 0.1 mg/ml boiled salmon sperm DNA). A radioactive *coxI* probe (367 bp sequence block C) was boiled for 5min and immediately chilled on ice prior to hybridization at 43°C or 58°C. The membranes were washed several times, each time for 15 min with increasing stringency and finally in 0.1X SSC, 0.1% SDS at 65°C.

**Enriched Mitochondrial Fractions.** *T. gondii* tachyzoites ( $\sim 2\text{-}4 \times 10^9$ ) were purified as in (Miranda et al. 2010). The purified suspension was centrifuged and the pellet resuspended in lysis buffer followed by centrifugation at 700 g. The wet pellet was mixed with silicon carbide and this mix was transferred to a mortar and manually ground for 3-4 15 sec periods. This mix was resuspended in ~20 ml of lysis buffer, decanted and clarified by three centrifugations at 50 X g (5 min) and 150 X g (twice) (10 min each). The supernatant was centrifuged at 1000 X g or 1200 X g for 10 min to collect the mitochondrial-enriched pellet.

**Nucleic acid Extraction and Sequencing.** DNA for Illumina (San Diego, CA, USA) and/or Oxford Nanopore (Oxford, United Kingdom) sequencing was extracted from *T. gondii* ME49 and *N. caninum* Nc-1 parasites using the DNeasy Blood and Tissue Kit (Qiagen) following the manufacturer's cultured cells protocol. The DNA was eluted from the spin columns using 50 µl Buffer AE. DNA was concentrated to a final concentration of 20 µg/ml using a speedvac and measured on a Qubit. PE-150 Illumina sequencing with a peak insert size range of 450-500 bp was performed at the Georgia Genomics and Bioinformatics Core on a MiSeq. MinION sequencing was performed using the Rapid Sequencing Kit, SQK-RAD004, and 400 ng of genomic DNA on a Nanopore flowcell 9.4.1 according to manufacturer instructions. MinKNOW version 18.03.1 was used to call bases.

## PCR

The High-fidelity Platinum Taq polymerase (Invitrogen, Waltham MA, USA) was used for PCR with: initial denaturation at 95°C for 3 minutes; followed by 35 cycles at 95°C for 60 s; 54°C for 45 s; and 72°C for 60 s. The PCR products were visualized with agarose gel electrophoresis and if not pure, bands were gel extracted prior to sequencing using a PCR purification kit (Qiagen, Hilden, Germany). If the yield was low, extracted DNA was used for a second PCR amplification.

**Analysis of Oxford Nanopore Reads.** Two strategies were used to identify mtDNA reads. First, the Nanopore reads were screened for the 21 mtDNA SBs using BLASTN (E-value  $1e^{-10}$ , nucleotide identity  $\geq 60\%$  and  $\leq 10\%$  alignment length mismatch). Second, the reads were aligned to the 21 mtDNA SBs using Exonerate v2.4.0 (Slater and Birney 2005). The best 2000 alignments with an alignment  $\geq 60\%$  were classified as putative mtDNA. To remove NUMT-containing reads, the putative mtDNA reads were aligned to *T. gondii* ME49 nuclear sequences masked for NUMTs using BWA v0.7.17 (Li and Durbin 2009). Non-aligning sequences were considered putative mitochondrial reads. Finally, error-correction was performed using proovread (Hackl et al. 2014) with *T. gondii* ME49 Illumina reads that mapped to the 21 mtDNA SBs (see below). These error-corrected reads (Supplemental Data S6) were annotated with mtDNA SBs using BLASTN as described. All unannotated sequence bits in each Nanopore read, which typically consisted of approximately 50-100 bp at the beginning of a read were examined and compared to each other for any repeating patterns to identify any additional mtDNA sequence.

The main difference between *T. gondii* and *N. caninum* SB's is due to the acquired presence of block Sp in *N. caninum* between blocks D and V altered version of SBs (NA) and (F/FpR) junctions. Closer examination of the SBs Sp and D in *N. caninum* revealed an 8 bp overlap between the 3' end of Sp and the 5' end of D suggesting microhomology as a possible mechanism for the creation of this arrangement.

**Dot Plot data set details.** The 21 full-length SBs (excluding partials) were compared to each other in Fig. 4A-B and Supplemental Fig S11 A-B. The sequences were sorted by size from largest to smallest, yielding the following SB order on each axis [C M E H K U T S I A P F N V L O R J D Q B]. The dot plots of the ONT reads utilized the 25 longest *N. caninum* ONT mtDNA reads and 48 longest *T. gondii* ME49 ONT mtDNA reads in the exact order represented below. Fig. 4C-E represent *T. gondii* ME49 ONT mtDNA reads plotted against themselves with different window sizes. Fig. 4F is a plot of 25 *N. caninum* ONT mtDNA reads on the vertical axis vs the same 48 *T. gondii* ME49 ONT mtDNA reads used in the other ONT panels. Data on the libraries that yielded these reads are located in Supplemental Table S3.

| Name      | Nanopore read name                   | Length | Name      | Nanopore read name                   | Length |
|-----------|--------------------------------------|--------|-----------|--------------------------------------|--------|
| NcNano_16 | a0171521-cbdd-4035-82cd-345f072b52f7 | 15781  | TgNano_27 | 80e16e15-e446-4e7a-8f3d-6bf9804672ae | 23356  |
| NcNano_17 | a9a80eee-fcb1-4987-bb5a-e8ed53a6fcaa | 8658   | TgNano_3  | 09d6f4a1-4c78-4aa5-aa9d-bcbfc0bfeddf | 15258  |
| NcNano_8  | 57b046b1-da7d-4790-935b-09aa7ce1c4ce | 8643   | TgNano_17 | 551bcaa6-78a6-4b11-8cc1-d28b1072aea4 | 14268  |
| NcNano_1  | 01b89a37-be91-4e28-9781-52a0a10b6c75 | 7846   | TgNano_13 | 4a67917f-40b9-4069-9a10-a3d0b14177fd | 14034  |
| NcNano_20 | c07fb06c-9bdd-4bb4-9490-85e66184f693 | 7620   | TgNano_4  | 188f54cf-e93c-47f4-beb9-79cf2224e25c | 11658  |
| NcNano_4  | 2b86c0e1-cde5-4131-a213-d3c308f0de49 | 6878   | TgNano_23 | 6b30cf05-c49e-409d-8415-724b469c9fef | 11059  |
| NcNano_15 | 95e710eb-ec54-46a8-9e6b-c41cefb9243b | 6845   | TgNano_11 | 445ac7c0-953a-4003-aa0c-9ff0a24ec9bb | 10009  |
| NcNano_21 | cce5a084-529d-4fc9-8211-5177e41487c0 | 6752   | TgNano_15 | 50a5090a-60db-4dda-8740-9ff7097a9e83 | 8691   |
| NcNano_12 | 829a9244-4c81-41f7-a799-7c54eb5794b5 | 6480   | TgNano_35 | cb691aab-c97f-4d85-862c-80a9a7c1c05f | 8683   |
| NcNano_11 | 73e6d7fe-dd77-4cc4-af78-cbb17e21d594 | 6470   | TgNano_28 | 9150e675-890e-40ab-b24d-db9db35a7a20 | 8402   |
| NcNano_24 | f974937c-c166-4dab-ada3-240bd5588e37 | 6305   | TgNano_41 | e5e52891-9720-47ec-9eb4-451adfe536c4 | 8338   |
| NcNano_7  | 34fce961-3df0-47fd-8d16-7d12c7fef7c0 | 6016   | TgNano_26 | 7876e473-7148-414d-8ff1-e6fb270b1582 | 7932   |
| NcNano_22 | de36d323-28ab-48d0-980d-229aaffe847d | 5776   | TgNano_7  | 22690990-a058-4283-b7c7-31fcd318a8bb | 7612   |
| NcNano_6  | 317cd209-e09b-41b2-a76a-96e5afb0fee1 | 5216   | TgNano_42 | e613ab53-3b6b-4c22-8d5a-057801b31fd1 | 7504   |
| NcNano_14 | 88daffdf-5eaf-47bf-98f8-c3cca524352f | 4705   | TgNano_30 | 9fade8e8-9bc2-41bb-8af4-0449ee8d2fc0 | 7463   |
| NcNano_10 | 71e21190-3867-410d-9a34-e8ff3cf41625 | 4449   | TgNano_32 | b077641f-e402-45f5-851e-acb894ac1e70 | 7352   |
| NcNano_5  | 2cca988f-4aaf-4911-991f-d20a5ba97bde | 4278   | TgNano_24 | 6fe0cf4c-f443-44c7-9ea9-908ea3a4d51a | 6674   |
| NcNano_25 | f9f9c531-a1f8-4163-88db-6f95141c96ed | 4196   | TgNano_33 | bfdae82-dff5-43b4-b161-534f47e8ab97  | 6344   |
| NcNano_23 | f2230b9b-c622-4082-ab40-472a1a68a1e1 | 3319   | TgNano_44 | e98b32e1-8494-454d-afc0-d178476e50c1 | 6224   |
| NcNano_3  | 0b9e1642-08f8-4e4c-838e-25929c5ad6b6 | 2961   | TgNano_47 | fc2f9aaf-fef5-4d97-aef4-dd91dc3e343f | 6217   |
| NcNano_2  | 01fba50a-71a0-4da0-bd8a-360f82565958 | 2959   | TgNano_43 | e65ceec9-469e-4c98-b797-923342f3f5ab | 6051   |
| NcNano_18 | b163171e-727d-4633-be8e-d68e5e118ada | 2622   | TgNano_40 | e32f2dad-4608-49ff-b62e-379af84de712 | 5828   |

|           |                                      |      |           |                                      |      |
|-----------|--------------------------------------|------|-----------|--------------------------------------|------|
| NcNano_9  | 6c5c7174-5cc4-4cf3-a49a-f8add8374521 | 2479 | TgNano_45 | f3772ab8-ad3c-4a45-90f4-41f8baf081ca | 5775 |
| NcNano_13 | 84abb7a8-e0b2-4e83-b2f2-33e1664fa20b | 1956 | TgNano_25 | 734acb5d-d7a7-4299-a6db-1032095a98d6 | 5635 |
| NcNano_19 | b189d5ef-6a1a-44c5-b81d-539f27986de1 | 1951 | TgNano_20 | 57b25780-5da3-489c-a075-0a1cbe13b8af | 5629 |
|           |                                      |      | TgNano_21 | 6248daa1-ea90-4b18-ae2c-682f8e67b080 | 5525 |
|           |                                      |      | TgNano_8  | 2334281a-0fd8-4c87-9478-cdbdc8366b3c | 5401 |
|           |                                      |      | TgNano_29 | 968eeb3d-bb74-4ff7-8c45-553b2e6c9529 | 5206 |
|           |                                      |      | TgNano_16 | 53ee132e-5707-4d09-97a3-a7171b0a1f81 | 5186 |
|           |                                      |      | TgNano_34 | c61269fa-fa08-4679-8983-f1a01a1635e4 | 4821 |
|           |                                      |      | TgNano_36 | cd0c4600-e5f6-4666-803b-dda5975e0db2 | 4748 |
|           |                                      |      | TgNano_9  | 2b941d62-dffb-41f4-bd3a-74d872421b0f | 4362 |
|           |                                      |      | TgNano_19 | 574ee7ee-519b-4d5d-a7b3-e1a83f9781c4 | 4302 |
|           |                                      |      | TgNano_14 | 4f9137f3-d610-44a1-ad50-da462668413d | 3844 |
|           |                                      |      | TgNano_6  | 215a3b8a-85c4-4ee8-9c1d-b2578589eb2c | 3827 |
|           |                                      |      | TgNano_5  | 1f2d5cfc-32c1-4a5c-8bfa-d9e8a7abb7c  | 3805 |
|           |                                      |      | TgNano_31 | ad9d243a-deef-4fa1-bef3-3734df6b0b3a | 3739 |
|           |                                      |      | TgNano_37 | cebf1af9-05be-4956-a6c1-6d9b6f5abb1e | 3659 |
|           |                                      |      | TgNano_39 | e0f8b1c5-1311-4f1b-9cc0-6f2d74d3eaeb | 3527 |
|           |                                      |      | TgNano_48 | 0d0d37ef-be92-43f4-83f6-f7099585641c | 3451 |
|           |                                      |      | TgNano_10 | 3e490cf6-dd1c-44d2-b39c-d2c7eed3a18e | 3126 |
|           |                                      |      | TgNano_22 | 64830f72-ed3f-48d6-b856-f25b6f751c83 | 3116 |
|           |                                      |      | TgNano_46 | fadfacb2-e251-4149-bc9f-c297168a76b2 | 2888 |
|           |                                      |      | TgNano_12 | 45d118dc-a990-4d53-8b47-612d9c0c7a89 | 2880 |
|           |                                      |      | TgNano_18 | 5570a5f7-480a-4c6d-a3e4-74e8b0e2893c | 2715 |
|           |                                      |      | TgNano_1  | 0102d442-3d3e-4b9b-aa5a-279a3a2d3d4b | 2651 |
|           |                                      |      | TgNano_2  | 08029a7a-3b57-4343-9250-b2e4475f00a2 | 2238 |
|           |                                      |      | TgNano_38 | de78e2ed-3a35-4183-92f6-b8aaedaf6e9e | 2089 |

**Circularization of Nanopore mtDNA reads.** To check if any of the Nanopore mtDNA reads circularize, Circlator v1.5.3 with minimus2 was used (Hunt et al. 2015).

## SUPPLEMENTAL REFERENCES

Edgar R. 2004. MUSCLE: multiple sequence alignment with high accuracy and high throughput. *Nucleic acids research* **32**: 1792-1797.

- Hackl T, Hedrich R, Schultz J, Forster F. 2014. proovread: large-scale high-accuracy PacBio correction through iterative short read consensus. *Bioinformatics* **30**: 3004-3011.
- Hikosaka K, Nakai Y, Watanabe Y, Tachibana S, Arisue N, Palacpac NM, Toyama T, Honma H, Horii T, Kita K et al. 2011. Concatenated mitochondrial DNA of the coccidian parasite *Eimeria tenella*. *Mitochondrion* **11**: 273-278.
- Hunt M, Silva ND, Otto TD, Parkhill J, Keane JA, Harris SR. 2015. Circlator: automated circularization of genome assemblies using long sequencing reads. *Genome Biol* **16**: 294.
- Li H, Durbin R. 2009. Fast and accurate short read alignment with Burrows-Wheeler transform. *Bioinformatics* **25**: 1754-1760.
- Miranda K, Pace DA, Cintron R, Rodrigues JC, Fang J, Smith A, Rohloff P, Coelho E, de Haas F, de Souza W et al. 2010. Characterization of a novel organelle in *Toxoplasma gondii* with similar composition and function to the plant vacuole. *Mol Microbiol* **76**: 1358-1375.
- Robinson JT, Thorvaldsdottir H, Winckler W, Guttman M, Lander ES, Getz G, Mesirov JP. 2011. Integrative genomics viewer. *Nat Biotechnol* **29**: 24-26.
- Slater GS, Birney E. 2005. Automated generation of heuristics for biological sequence comparison. *BMC Bioinformatics* **6**: 31.
